# Supplementary material for: Total synthesis of sulfolipid-1
Source: Royal Society of Chemistry journal article supplement (doi:10.1039/c3cc48087a), 2014-01-01

## Supporting Information for

# Total Synthesis of Sulfolipid-I

Danny Geerdink and Adriaan J. Minnaard

## Table of contents

|                                                                              |     |
|------------------------------------------------------------------------------|-----|
| 1. Figure 1SI - $^1\text{H}$ -NMR spectra of natural and synthetic SL-1..... | S2  |
| 2. Figure 2SI – HRMS spectra of synthetic SL-1.....                          | S3  |
| 3. General remarks.....                                                      | S4  |
| 4. Spectral data of all new compounds.....                                   | S5  |
| 5. NMR spectra of all new compounds.....                                     | S14 |

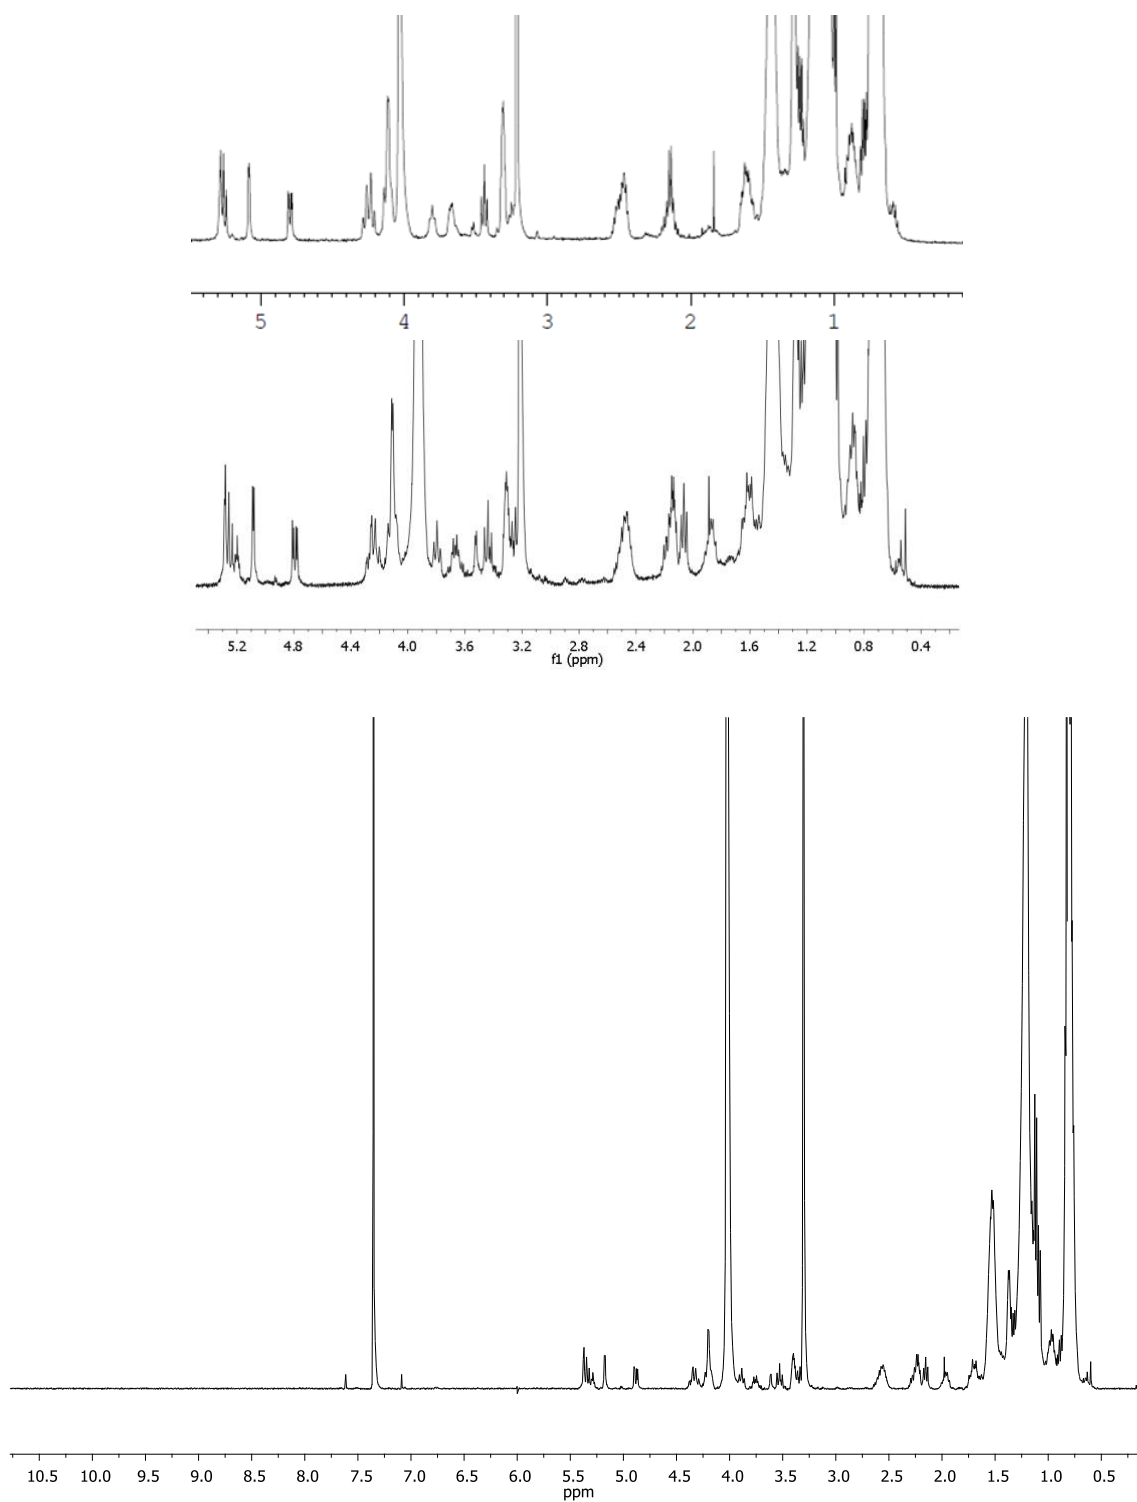

**Figure 1SI**  $^1\text{H}$ -NMR spectra of natural (*up*) and synthetic (*middle and bottom*) sulfolipid-1

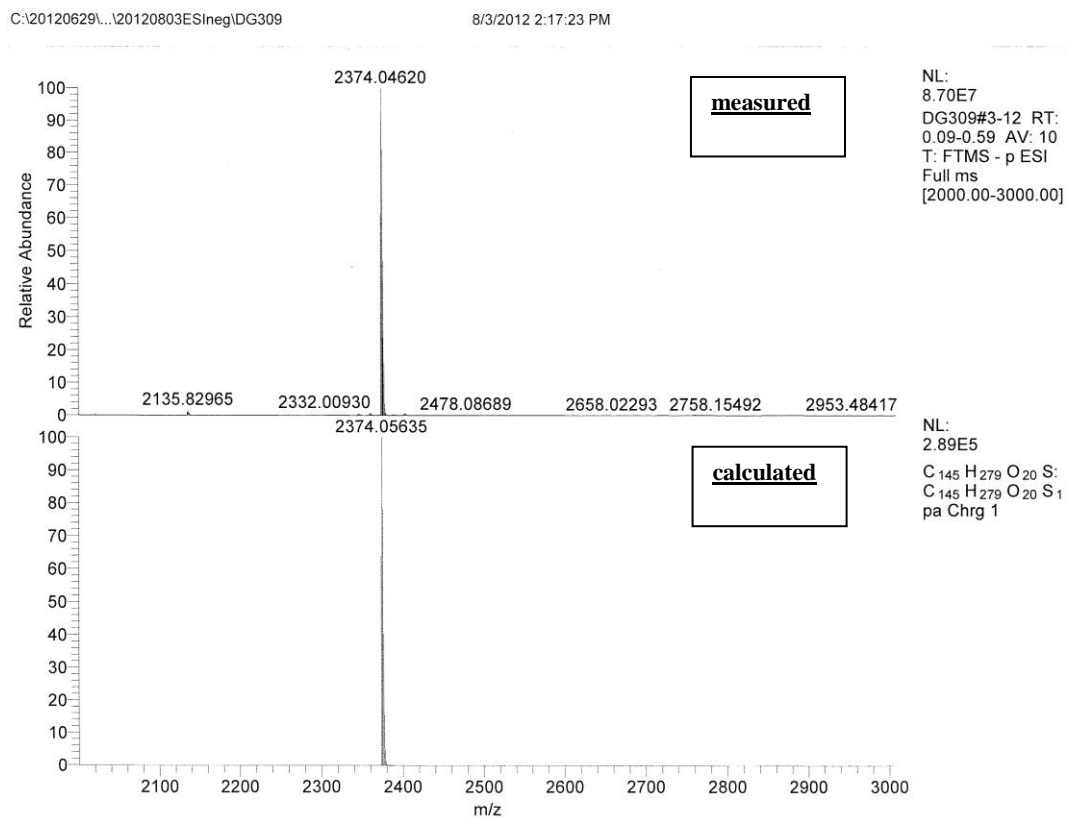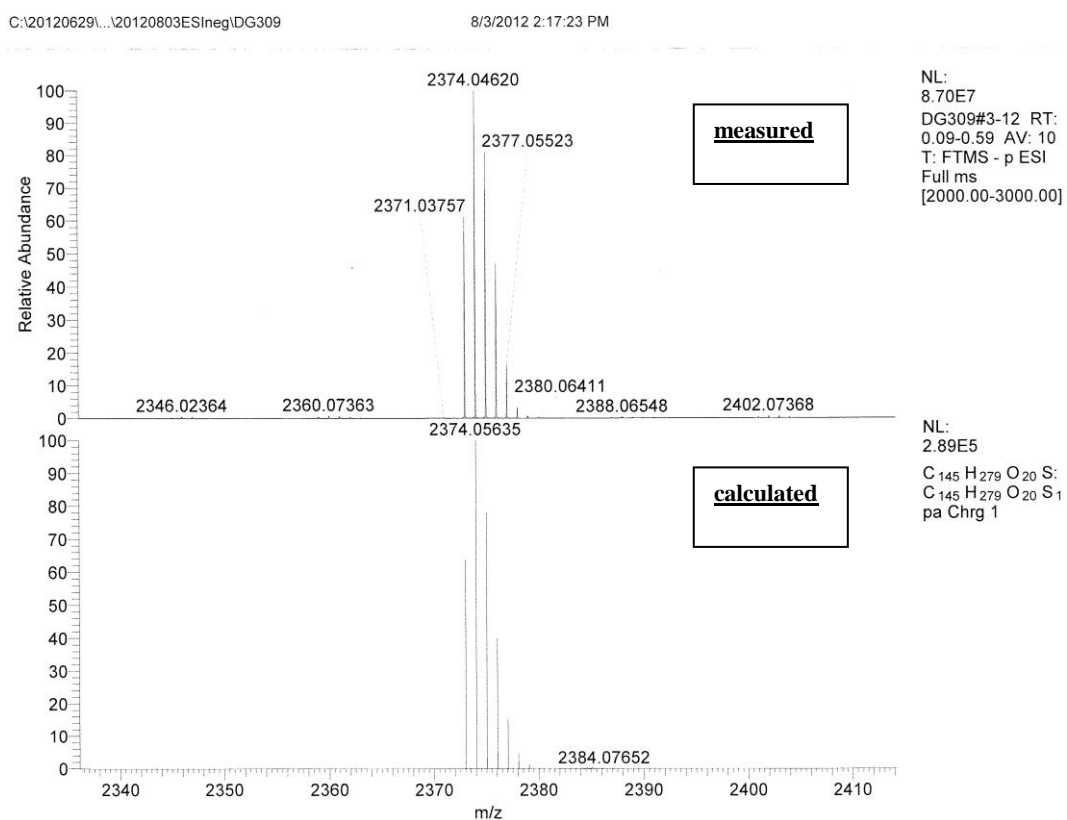

Figure 2SI Mass spectra of synthetic sulfolipid-1

### General remarks

All reactions were performed using oven or flame-dried glassware and dry solvents. Solvents were taken from a MBraun solvent purification system (SPS-800). All other reagents were purchased from Sigma Aldrich, Acros, TCI Europe, Alfa Aesar, Chempur or Fluorochem and used without any further purification unless noted otherwise. Grignard reagents were titrated using *s*-BuOH and catalytic amounts of 1,10-phenanthroline. Fatty acids **3** and **5** were prepared according to a previously reported route.<sup>1</sup>

<sup>1</sup>H- and <sup>13</sup>C-NMR spectra were recorded on a Varian AMX400 or a Varian 400-MR (400, 100.59 MHz, respectively) using CDCl<sub>3</sub> or CD<sub>3</sub>OD as solvent, unless stated otherwise. Chemical shift values are reported in ppm with the solvent resonance as the internal standard (CDCl<sub>3</sub>: δ 7.26 for <sup>1</sup>H, δ 77.0 for <sup>13</sup>C, CD<sub>3</sub>OD: δ 3.31 for <sup>1</sup>H) or using TMS. Data are reported as follows: chemical shifts (δ), multiplicity (s = singlet, d = doublet, dd = double doublet, td = triple doublet, t = triplet, q = quartet, br = broad, m = multiplet), coupling constants *J* (Hz), and integration. Due to the (multiple) long alkyl chains in some of the compounds we unfortunately could not resolve all individual signals for every carbon atom in the <sup>13</sup>C NMR spectra. High resolution mass spectra (HRMS) were recorded on a Thermo Scientific LTQ Orbitrap XL or on a AEI-MS-902 spectrometer.

Flash chromatography was performed using SiliCycle silica gel type SiliaFlash P60 (230 – 400 mesh) as obtained from Screening Devices or with automated column chromatography using a Reveleris flash purification system purchased from Grace Davison Discovery Sciences. TLC analysis was performed on Merck silica gel 60/Kieselguhr F254, 0.25 mm. Compounds were visualized using either Seebach's reagent (a mixture of phosphomolybdic acid (25 g), cerium (IV) sulfate (7.5 g), H<sub>2</sub>O (500 mL) and H<sub>2</sub>SO<sub>4</sub> (25 mL)) or a KMnO<sub>4</sub> stain (K<sub>2</sub>CO<sub>3</sub> (40 g), KMnO<sub>4</sub> (6 g), H<sub>2</sub>O (600 mL) and 10% NaOH (5 mL)).

(2*R*,4*aR*,6*R*,7*R*,8*S*,8*aR*)-8-(((*S*)-2-methylbutanoyl)oxy)-2-phenyl-6-(((5*aR*,6*R*,7*aR*,10*R*,11*aR*,11*bS*)-2,2,4,4-tetraisopropyl-10-phenylhexahydro-[1,3]dioxino[4',5':5,6]pyrano[3,4-*f*][1,3,5,2,4]trioxadisilepin-6-yl)oxy)hexahydropyrano[3,2-*d*][1,3]dioxin-7-yl palmitate (**7a**):

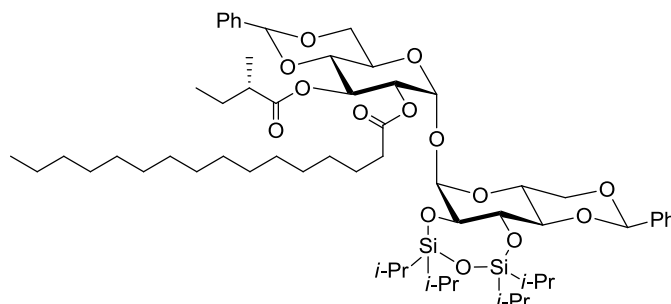

To (*S*)-methylbutyric acid (1.2 eq, 24 mg, 0.24 mmol) in benzene (3 mL) was added Et<sub>3</sub>N (2.2 eq, 44 mg, 0.44 mmol) and 2,4,6-trichlorobenzoyl chloride (1.2 eq, 58 mg, 0.24 mmol). The mixture was stirred for 1 h and subsequently **6** (1 eq, dissolved in 1 mL benzene) and DMAP (1.3 eq, 32 mg, 0.26 mmol) were added, upon which the mixture turned into a white suspension. After 48 h the suspension was quenched with a sat. aq. solution of NaHCO<sub>3</sub> (4 mL) and extracted with EtOAc (3 x 5 mL). The combined organic layers were dried, filtered and all volatiles were evaporated. Purification using column chromatography (pentane/EtOAc, 20:1) afforded **7a** as a colorless oil with traces of an inseparable impurity (161 mg, 74%).

<sup>1</sup>H NMR (400 MHz, CDCl<sub>3</sub>) δ 7.53 – 7.39 (m, 4H), 7.39 – 7.30 (m, 6H), 5.69 (t, *J* = 9.8, 1H), 5.54 (s, 1H), 5.50 (s, 1H), 5.40 (d, *J* = 3.8, 1H), 5.15 (d, *J* = 4.1, 1H), 5.04 (dd, *J* = 9.9, 3.9, 1H), 4.34 (td, *J* = 10.0, 4.9, 1H), 4.27 – 4.19 (m, 2H), 4.15 (dd, *J* = 10.1, 4.7, 1H), 3.93 (dd, *J* = 8.4, 4.2, 1H), 3.85 (td, *J* = 10.0, 4.7, 1H), 3.78 – 3.66 (m, 3H), 3.53 (t, *J* = 9.3, 1H), 2.41 – 2.25 (m, 3H), 1.72 – 1.53 (m, 3H), 1.47 – 1.38 (m, 1H), 1.34 – 1.00 (m, 55H), 0.90 (t, *J* = 6.8, 3H), 0.86 (t, *J* = 7.4, 3H); HRMS-(ESI<sup>+</sup>) calculated for C<sub>59</sub>H<sub>95</sub>O<sub>14</sub>Si<sub>2</sub> [M + H]<sup>+</sup> 1083.6260 Da, found 1083.6251 Da.

Table 1SI. Optimization of the regioselective reductive ring-opening

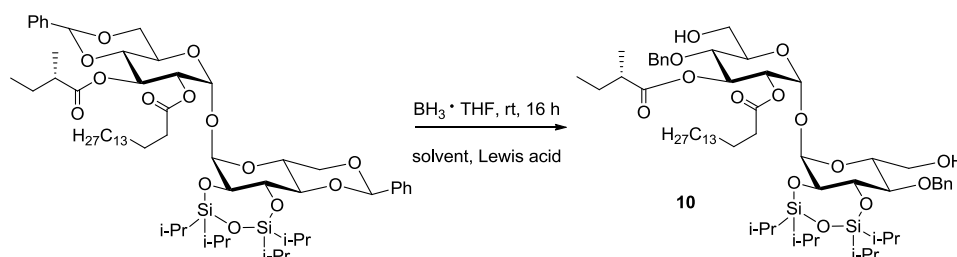

| entry <sup>a</sup> | solvent | lewis acid (eq)             | eq. BH <sub>3</sub> ·THF | yield <sup>b</sup> (%) |
|--------------------|---------|-----------------------------|--------------------------|------------------------|
| 1                  | THF     | CoCl <sub>2</sub> (5)       | 6                        | 0 <sup>c</sup>         |
| 2                  | DCM     | Cu(OTf) <sub>2</sub> (0.25) | 10                       | 31                     |
| 3                  | DCM     | TMSOTf (0.3)                | 4                        | 16                     |
| 4                  | DCM     | TMSOTf (0.3)                | 12                       | 59                     |

<sup>a</sup> Reactions were performed at 0.018 mmol scale. <sup>b</sup> Yield of the isolated product. <sup>c</sup> No conversion

**(2*R*,3*R*,4*S*,5*R*,6*R*)-5-(benzyloxy)-2-(((5*aR*,6*R*,8*R*,9*R*,9*aS*)-9-(benzyloxy)-8-(hydroxymethyl)-2,2,4,4-tetraisopropyltetrahydro-5*aH*-pyrano[3,4-*f*][1,3,5,2,4]trioxadisilepin-6-yl)oxy)-6-(hydroxymethyl)-4-(((*S*)-2-methylbutanoyl)oxy)tetrahydro-2*H*-pyran-3-yl palmitate (**10**):**

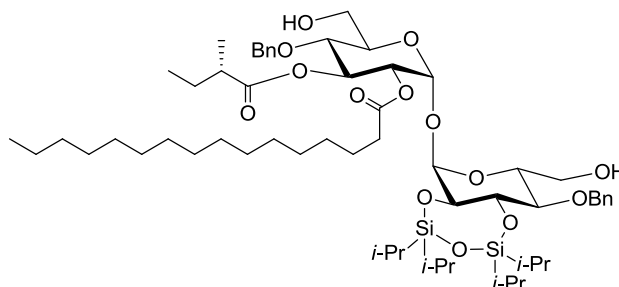

To a solution of **7a** (20 mg, 0.018 mmol, stripped three times with toluene) in DCM (1 mL) under argon atmosphere, was added  $\text{BH}_3 \cdot \text{THF}$  complex (12 eq, 0.221 mL, 1 M solution in THF) and after 5 min, freshly distilled ( $\text{N}_2$ -atmosphere) TMSOTf (0.3 eq, 0.8  $\mu\text{L}$ ). After stirring for 16 h, the reaction was quenched with  $\text{Et}_3\text{N}$  (0.1 mL) and MeOH (2 mL). The mixture was concentrated and the crude material was purified using column chromatography (pentane/EtOAc, 2:1) affording **10** as a colorless oil (11.3 mg, 59% yield).

**$^1\text{H}$  NMR** (400 MHz,  $\text{CDCl}_3$ )  $\delta$  7.38 – 7.22 (m, 10H), 5.64 (t,  $J$  = 9.7, 1H), 5.27 (d,  $J$  = 3.7, 1H), 5.04 (d,  $J$  = 3.9, 1H), 4.97 (d,  $J$  = 11.2, 1H), 4.87 (dd,  $J$  = 10.2, 3.7, 1H), 4.70 – 4.57 (m, 3H), 4.26 (t,  $J$  = 8.7, 1H), 4.16 (d,  $J$  = 10.0, 1H), 3.82 – 3.70 (m, 4H), 3.69 – 3.57 (m, 3H), 3.45 (t,  $J$  = 8.9, 1H), 2.29 – 2.22 (m, 3H), 1.75 – 1.34 (m, 4H), 1.28 – 0.94 (m, 55H), 0.88 (t,  $J$  = 7.0, 3H), 0.86 (t,  $J$  = 7.5, 3H);  **$^{13}\text{C}$  NMR** (101 MHz,  $\text{CDCl}_3$ )  $\delta$  175.05, 173.34, 138.18, 137.98, 128.35, 128.28, 128.19, 128.14, 127.78, 127.47, 127.16, 127.13, 94.01, 91.45, 77.65, 77.47, 75.49, 75.19, 74.58, 74.07, 71.35, 71.10, 71.05, 70.88, 61.70, 61.13, 41.05, 33.93, 31.90, 29.68, 29.66, 29.64, 29.60, 29.55, 29.45, 29.34, 29.22, 29.12, 26.59, 24.50, 22.67, 17.49, 17.44, 17.34, 17.29, 17.26, 17.23, 17.15, 17.13, 17.11, 16.21, 14.09, 12.81, 12.68, 12.22, 12.00, 11.59; **HRMS**-(ESI+) calculated for  $\text{C}_{59}\text{H}_{98}\text{O}_{14}\text{Si}_2\text{Na}$   $[\text{M} + \text{Na}]^+$  1109.6387 Da, found 1109.6380 Da.

**(2*R*,3*R*,4*S*,5*R*,6*R*)-5-(benzyloxy)-2-(((5*aR*,6*R*,8*R*,9*R*,9*aS*)-9-(benzyloxy)-2,2,4,4-tetraisopropyl-8-(((*S*)-2-methylbutanoyl)oxy)methyl)tetrahydro-5*aH*-pyrano[3,4-*f*][1,3,5,2,4]trioxadisilepin-6-yl)oxy)-4-(((*S*)-2-methylbutanoyl)oxy)-6-(((*S*)-2-methylbutanoyl)oxy)methyl)tetrahydro-2*H*-pyran-3-yl palmitate (**11**):**

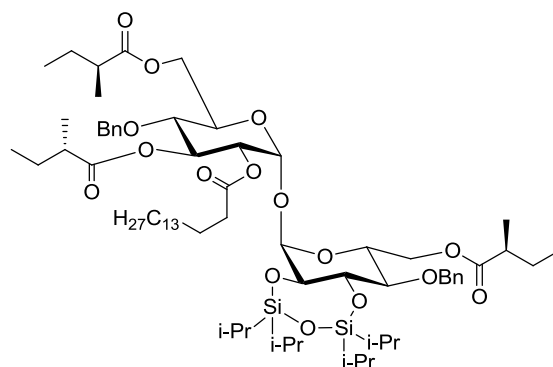

To a solution of diol **10** (128 mg, 0.12 mmol) in DCM (4 mL) was added EDC·HCl (2.2 eq., 49.6 mg, 0.26 mmol), DMAP (4.1 eq, 59 mg, 0.48 mmol) and (*S*)-methylbutyric acid (2.15 eq, 27.6  $\mu\text{L}$ , 0.25 mmol) at rt. The mixture was stirred for 16 h and was then diluted with 10 mL EtOAc. The organic layer was washed with sat. aq.  $\text{NaHCO}_3$  (10 mL), brine (10 mL) and dried over  $\text{MgSO}_4$ . After filtration, all volatiles were evaporated and the crude product was

purified using flash column chromatography (silica, pentane/EtOAc 20:1) to afford **11** as a colorless oil (127 mg, 86% yield).

**<sup>1</sup>H NMR** (400 MHz, CDCl<sub>3</sub>) δ 7.40 – 7.17 (m, 10H), 5.66 (t, *J* = 9.4, 1H), 5.21 (d, *J* = 3.6, 1H), 5.08 (d, *J* = 3.8, 1H), 4.99 (AB-6, *J* = 11.0, 1H), 4.96 (dd, *J* = 10.2, 3.7, 1H), 4.63 (AB-6', *J* = 11.1, 1H), 4.57 (AB-6, *J* = 11.0, 1H), 4.51 (AB-6', *J* = 11.1, 1H), 4.37 – 4.14 (m, 6H), 3.87 – 3.81 (m, 1H), 3.79 (dd, *J* = 9.0, 3.8, 1H), 3.65 (t, *J* = 9.5, 1H), 3.36 (dd, *J* = 10.1, 8.5, 1H), 2.48 – 2.35 (m, 2H), 2.32 – 2.21 (m, 3H), 1.77 – 1.34 (m, 6H), 1.32 – 1.01 (m, 63H), 0.99 – 0.83 (m, 12H); **<sup>13</sup>C NMR** (101 MHz, CDCl<sub>3</sub>) δ 176.36, 176.29, 174.91, 172.85, 137.95, 137.58, 128.31, 128.20, 127.90, 127.72, 127.54, 127.04, 93.22, 90.82, 78.41, 77.46, 76.35, 75.32, 74.48, 74.16, 71.53, 70.54, 69.01, 68.64, 62.77, 62.20, 41.03, 40.95, 40.79, 33.98, 31.91, 29.68, 29.67, 29.65, 29.64, 29.58, 29.42, 29.34, 29.19, 29.12, 26.76, 26.56, 24.54, 22.67, 17.49, 17.43, 17.38, 17.29, 17.18, 17.14, 17.12, 16.51, 16.45, 16.13, 14.10, 12.83, 12.74, 12.32, 12.05, 11.58, 11.57, 11.52; **HRMS**-(ESI+) calculated for C<sub>69</sub>H<sub>116</sub>O<sub>16</sub>Si<sub>2</sub> [M + H]<sup>+</sup> 1255.7724 Da, found 1255.7718 Da.

**(2*R*,3*R*,4*S*,5*R*,6*R*)-5-(benzyloxy)-2-(((2*R*,3*R*,4*R*,5*S*,6*R*)-5-(benzyloxy)-3,4-dihydroxy-6-(((*S*)-2-methylbutanoyl)oxy)methyl)tetrahydro-2H-pyran-2-yl)oxy)-4-(((*S*)-2-methylbutanoyl)oxy)-6-(((*S*)-2-methylbutanoyl)oxy)methyl)tetrahydro-2H-pyran-3-yl palmitate (**15**):**

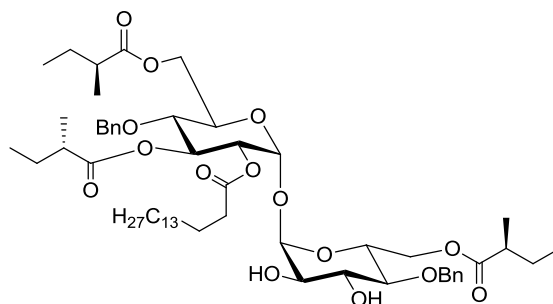

To compound **11** (30 mg, 0.024 mmol) in THF (0.5 mL) was added TBAF (40 eq, 0.96 mL, 1 M solution in THF, acidified to pH 6.5 with TFA). The mixture was heated to 40 °C for 24 h, and diluted with EtOAc (2 mL) afterwards. The organic layer was washed with water (2 mL) and then dried over MgSO<sub>4</sub>. After filtration, the solvent was evaporated and the product was purified using flash column chromatography (pentane/EtOAc 3:2) to afford **15** (22 mg, 91% yield) as a colorless oil.

**<sup>1</sup>H NMR** (400 MHz, CDCl<sub>3</sub>) δ 7.38 – 7.20 (m, 10H), 5.62 (t, *J* = 9.6 1H), 5.24 (d, *J* = 3.8, 1H), 5.11 (d, *J* = 3.7, 1H), 4.97 (dd, *J* = 10.3, 3.8, 1H), 4.82 (AB-6, *J* = 11.3, 1H), 4.66 (AB-6, *J* = 11.3, 1H), 4.62 (AB-6', *J* = 10.8, 1H), 4.52 (AB-6', *J* = 10.8, 1H), 4.38 (d, *J* = 10.2, 1H), 4.26 – 4.16 (m, 4H), 4.01 (t, *J* = 9.2, 1H), 3.81 (dt, *J* = 9.7, 3.7, 1H), 3.65 (t, *J* = 9.5, 1H), 3.61 – 3.54 (m, 1H), 3.37 (t, *J* = 9.7, 1H), 2.49 – 2.35 (m, 2H), 2.34 – 2.21 (m, 3H), 1.77 – 1.37 (m, 8H), 1.28 – 1.19 (m, 24H), 1.17 (d, *J* = 7.0, 3H), 1.13 (d, *J* = 7.0, 3H), 1.10 (d, *J* = 7.0, 3H), 0.95 – 0.84 (m, 12H); **<sup>13</sup>C NMR** (101 MHz, CDCl<sub>3</sub>) δ 176.30, 176.23, 175.50, 172.73, 137.94, 137.04, 128.53, 128.50, 128.07, 127.96, 127.86, 127.84, 127.79, 93.53, 91.36, 77.69, 76.29, 74.77, 74.66, 74.41, 71.95, 71.37, 70.30, 69.63, 69.14, 62.50, 62.13, 41.01, 40.97, 40.88, 33.93, 31.92, 29.69, 29.68, 29.65, 29.60, 29.45, 29.35, 29.24, 29.16, 26.77, 26.72, 26.59, 24.60, 22.68, 16.57, 16.46, 16.11, 14.11, 11.62, 11.57; **HRMS**-(ESI+) calculated for C<sub>57</sub>H<sub>88</sub>O<sub>15</sub>Na [M + Na]<sup>+</sup> 1035.6021 Da, found 1035.6024 Da.

**(2*R*,3*R*,4*S*,5*R*,6*R*)-5-(benzyloxy)-2-(((2*R*,3*R*,4*S*,5*S*,6*R*)-5-(benzyloxy)-4-hydroxy-6-(((*S*)-2-methylbutanoyl)oxy)methyl)-3-(((2,2,2-trichloroethoxy)sulfonyl)oxy)tetrahydro-2H-pyran-2-yl)oxy)-4-(((*S*)-2-methylbutanoyl)oxy)-6-(((*S*)-2-methylbutanoyl)oxy)methyl)tetrahydro-2H-pyran-3-yl palmitate (16):**

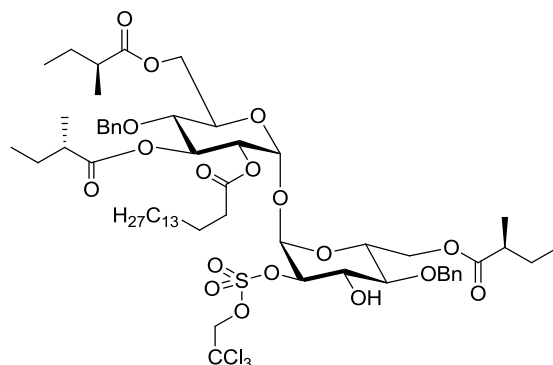

To **15** (32 mg, 0.032 mmol) in DCM (1 mL) was added imidazolium salt **13** (2 eq, 29 mg, 0.063 mmol, prepared according to a previously reported procedure).<sup>[1]</sup> The mixture was cooled to 0 °C and 1,2-dimethylimidazole (2.5 eq, 7.6 mg, 0.079 mmol) was added as a solution in DCM (0.5 mL) over 4 h. The reaction was allowed to reach rt after which it was stirred for 72 h. The mixture was diluted with DCM (3 mL) and the organic layer was washed with brine. The organic layer was dried over MgSO<sub>4</sub>, filtered and all volatiles were evaporated. The product was purified using flash chromatography (pentane/EtOAc 10:1) to afford **16** as a colorless oil (19 mg, 49% yield).

**<sup>1</sup>H NMR** (400 MHz, CDCl<sub>3</sub>) δ 7.42 – 7.20 (m, 10H), 5.60 (t, *J* = 9.4, 1H), 5.40 (d, *J* = 3.7, 1H), 5.21 (d, *J* = 3.8, 1H), 5.00 (dd, *J* = 10.3, 3.8, 1H), 4.87, 4.76 (AB-CH<sub>2</sub>CCl<sub>3</sub>, *J* = 10.8, 2H), 4.71 (d, *J* = 4.6, 2H), 4.59, 4.54 (AB system, *J* = 10.8, 2H), 4.50 (dd, *J* = 10.0, 3.7, 1H), 4.37 (ddd, *J* = 16.0, 12.6, 2.8, 2H), 4.30 – 4.20 (m, 3H), 4.17 (dt, *J* = 10.1, 2.7, 1H), 3.95 – 3.89 (m, 1H), 3.69 (t, *J* = 9.7, 1H), 3.45 (t, *J* = 7.2, 1H), 2.52 – 2.36 (m, 3H), 2.35 – 2.20 (m, 2H), 1.80 – 1.35 (m, 8H), 1.27 – 1.22 (m, 24H), 1.17 (d, *J* = 7.0, 3H), 1.15 (d, *J* = 7.0, 3H), 1.09 (d, *J* = 7.0, 3H), 0.96 – 0.81 (m, 12H); **<sup>13</sup>C NMR** (101 MHz, CDCl<sub>3</sub>) δ 176.20 (2 x C), 175.42, 172.57, 137.25, 137.13, 128.82, 128.44, 128.42, 127.94, 127.91, 127.71, 92.66, 92.45, 92.00, 81.02, 81.00, 79.90, 78.41, 75.89, 75.27, 74.35, 71.05, 70.67, 70.20, 69.54, 69.27, 61.82, 40.93, 40.90, 40.87, 33.91, 31.91, 29.69, 29.68, 29.66, 29.65, 29.60, 29.44, 29.35, 29.25, 29.18, 26.79, 26.56, 24.58, 22.68, 16.54, 16.51, 16.06, 14.12, 11.63, 11.60; **HRMS**-(ESI<sup>+</sup>) calculated for C<sub>91</sub>H<sub>146</sub>Cl<sub>3</sub>O<sub>17</sub>S [M + H]<sup>+</sup> 1647.9346 Da, found 1647.9355 Da.

**sodium (2*R*,3*R*,4*S*,5*S*,6*R*)-4,5-dihydroxy-2-(((2*R*,3*R*,4*S*,5*R*,6*R*)-5-hydroxy-4-(((*S*)-2-methylbutanoyl)oxy)-6-(((*S*)-2-methylbutanoyl)oxy)methyl)-3-(palmitoyloxy)tetrahydro-2H-pyran-2-yl)oxy)-6-(((*S*)-2-methylbutanoyl)oxy)methyl)tetrahydro-2H-pyran-3-yl sulfate (17):**

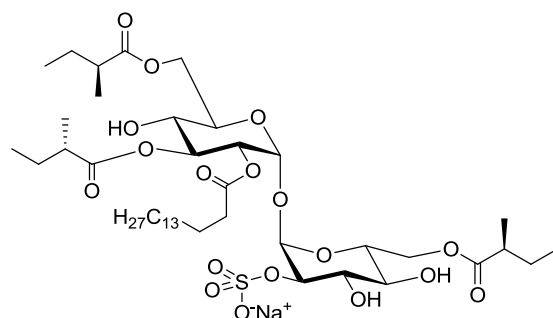

To compound **16** (16 mg, 0.013 mmol) was added DCM (0.5 mL) and MeOH (1 mL). Ammonium formate (20 eq, 16.5 mg, 0.26 mmol) was added and after everything had dissolved, Pd(OH)<sub>2</sub> (1 eq, 9 mg, 20% weight on carbon) was added. The mixture was placed under a H<sub>2</sub> atmosphere (1 bar, balloon) using three vacuum/N<sub>2</sub> cycles



followed by four vacuum/H<sub>2</sub> cycles. After 16 h, TLC showed complete conversion of the starting material and the mixture was filtered over Celite and concentrated. <sup>1</sup>H NMR spectroscopy showed complete removal of the TCE group but incomplete deprotection of the benzyl ethers. The crude product was redissolved in DCM (0.5 mL) and MeOH (1 mL). Pd(OH)<sub>2</sub> (1.2 eq, 11 mg) was added and the reaction was placed under a H<sub>2</sub> atmosphere (1 bar, balloon) and left for 48 h. After this period, TLC indicated the appearance of one major product, which was purified using column chromatography (8% MeOH in DCM). The ammonium salt was flushed over a DOWEX Na<sup>+</sup> ion-exchange column (DCM/MeOH 9:1) to give **17** as a viscous colorless oil (6.0 mg, 49%).

**<sup>1</sup>H NMR** (400 MHz, CDCl<sub>3</sub>/MeOD 9:1) δ 5.33 (d, *J* = 4.0, 1H), 5.31 (t, *J* = 9.7, 1H), 5.13 (d, *J* = 3.4, 1H), 4.86 (dd, *J* = 10.3, 3.5, 1H), 4.31 (m, 2H), 4.25 – 4.11 (m, 4H), 3.83 (t, *J* = 9.3, 1H), 3.76 – 3.69 (m, 1H), 3.49 (t, *J* = 9.8, 1H), 3.32 (t, *J* = 9.6, 1H), 2.41 – 2.25 (m, 3H), 2.23 – 2.15 (m, 2H), 1.66 – 1.31 (m, 8H), 1.24 – 1.13 (m, 24H), 1.07 (d, *J* = 7.0, 3H), 1.06 (d, *J* = 7.0, 3H), 1.04 (d, *J* = 7.0, 3H), 0.87 – 0.76 (m, 12H); **HRMS**-(ESI-) calculated for C<sub>43</sub>H<sub>75</sub>O<sub>18</sub>SNa<sub>2</sub> [M + Na]<sup>+</sup> 957.4470 Da, found 957.4468 Da.

**(2*S*,4*S*,6*S*,8*S*,10*S*,12*S*,14*S*)-(2*R*,4*aR*,6*R*,7*R*,8*S*,8*aR*)-7-(palmitoyloxy)-2-phenyl-6-(((5*aR*,6*R*,7*aR*,10*R*,11*aR*,11*bS*)-2,2,4,4-tetraisopropyl-10-phenylhexahydro [1,3]dioxino[4',5':5,6]pyrano[3,4-f][1,3,5,2,4]trioxadisilepin-6-yl)oxy)hexahydropyrano[3,2-d][1,3]dioxin-8-yl 2,4,6,8,10,12,14-heptamethyltriacontanoate (**7**):**

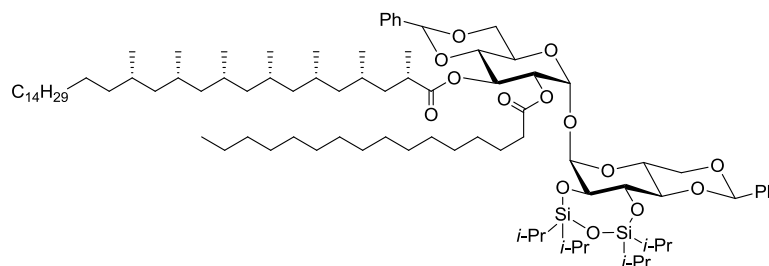

To carboxylic acid **3** (1.05 eq, 40 mg, 0.073 mmol)<sup>[2]</sup> in benzene (1 mL) was added Et<sub>3</sub>N (2.2 eq, 15.4 mg, 0.152 mmol) and 2,4,6-trichlorobenzoyl chloride (1.1 eq, 5.2 mg, 0.021 mmol). The mixture was stirred for 1 h, and **6** (1 eq, dissolved in 0.4 mL benzene) and DMAP (1.1 eq, 9.3 mg, 0.076 mmol) were added, upon which the mixture turned into a white suspension. After 48 h, the suspension was quenched with sat. aq. NaHCO<sub>3</sub> (4 mL) and extracted with EtOAc (3 x 5 mL). The combined organic layers were dried, filtered and all volatiles were evaporated. Purification using column chromatography (pentane/EtOAc 20:1) afforded **7** as a colorless oil (81 mg, 76%).

**<sup>1</sup>H NMR** (400 MHz, CDCl<sub>3</sub>) δ 7.46 (dd, *J* = 6.6, 3.0, 2H), 7.40 (dd, *J* = 6.7, 3.0, 2H), 7.36 – 7.31 (m, 6H), 5.67 (t, *J* = 9.8, 1H), 5.54 (s, 1H), 5.47 (s, 1H), 5.39 (d, *J* = 3.8, 1H), 5.13 (d, *J* = 4.1, 1H), 5.03 (dd, *J* = 10.0, 3.8, 1H), 4.32 (td, *J* = 9.9, 5.0, 1H), 4.27 – 4.18 (m, 2H), 4.17 – 4.11 (m, 1H), 3.91 (dd, *J* = 8.5, 4.1, 1H), 3.82 (td, *J* = 10.0, 4.6, 1H), 3.78 – 3.61 (m, 3H), 3.52 (t, *J* = 9.2, 1H), 2.63 – 2.52 (m, 1H), 2.41 – 2.24 (m, 2H), 1.83 – 1.72 (m, 1H), 1.65 – 1.45 (m, 8H), 1.37 – 1.03 (m, 93H), 0.92 – 0.75 (m, 27H); **<sup>13</sup>C NMR** (101 MHz, CDCl<sub>3</sub>) δ 175.22, 173.15, 137.60, 137.06, 128.80, 128.56, 127.98, 127.93, 126.11, 125.90, 101.42, 101.09, 94.44, 91.92, 81.10, 79.43, 75.24, 73.40, 70.88, 68.73, 68.71, 68.38, 62.82, 62.51, 45.63, 45.42, 45.04, 44.95, 39.83, 37.55, 36.44, 33.90, 31.93, 30.06, 29.99, 29.76, 29.70, 29.68, 29.66, 29.56, 29.48, 29.38, 29.36, 29.15, 29.11, 27.82, 27.48, 27.40, 27.30, 27.02, 26.88, 26.55, 24.61, 22.69, 21.26, 21.13, 21.05, 20.66, 20.60, 20.56, 18.52, 17.45, 17.40, 17.32, 17.21, 17.15, 17.12, 17.00, 14.12, 12.89, 12.65, 12.29, 11.70; **HRMS**-(ESI+) calculated for C<sub>91</sub>H<sub>159</sub>O<sub>14</sub>Si<sub>2</sub> [M + H]<sup>+</sup> 1532.1268 Da, found 1532.1263 Da.

(2*S*,4*S*,6*S*,8*S*,10*S*,12*S*,14*S*)-(2*R*,3*R*,4*S*,5*R*,6*R*)-3-(benzyloxy)-6-(((5*aR*,6*R*,8*R*,9*R*,9*aS*)-(benzyloxy)-8-(hydroxymethyl)-2,2,4,4-tetraisopropyltetrahydro-5*aH*-pyrano[3,4-*f*][1,3,5,2,4]trioxadisilepin-6-yl)oxy)-2-(hydroxymethyl)-5-(palmitoyloxy)tetrahydro-2*H*-pyran-4-yl 2,4,6,8,10,12,14-heptamethyltriacontanoate (8):

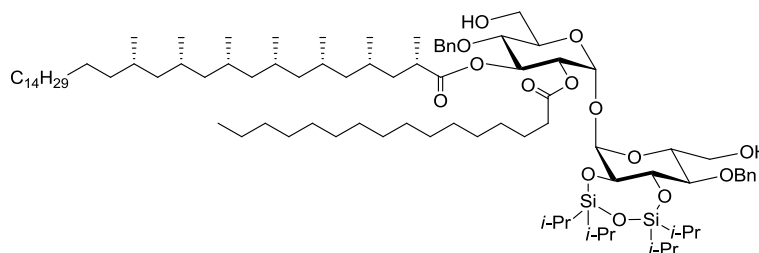

To a solution of **7** (48 mg, 0.031 mmol, stripped three times with toluene) in DCM (1 mL) under argon atmosphere, was added BH<sub>3</sub>•THF complex (12 eq, 0.38 mL, 1 M solution in THF) and after 5 minutes, freshly distilled TMSOTf (0.3 eq, 3.40 µL). After stirring for 16 h, the reaction was quenched with Et<sub>3</sub>N (0.1 mL) and MeOH (2 mL). The mixture was concentrated and the crude material was purified using column chromatography (pentane/EtOAc, 3:1) affording **8** as a colorless oil (28 mg, 59%).

**<sup>1</sup>H NMR** (400 MHz, CDCl<sub>3</sub>) δ 7.41 – 7.17 (m, 10H), 5.64 (t, *J* = 9.6, 1H), 5.28 (d, *J* = 3.6, 1H), 5.04 (d, *J* = 3.8, 1H), 4.97 (AB-6, *J* = 11.2, 1H), 4.86 (dd, *J* = 12.1, 5.6, 1H), 4.67 (AB-6', *J* = 11.4, 1H), 4.66 (AB-6, *J* = 11.2, 1H), 4.61 (AB-6', *J* = 11.6, 1H), 4.27 (t, *J* = 8.8, 1H), 4.15 (d, *J* = 10.0, 1H), 3.82 – 3.69 (m, 4H), 3.69 – 3.56 (m, 3H), 3.45 (t, *J* = 9.0, 1H), 2.48 (q, *J* = 14.5, 6.9, 1H), 2.24 (td, *J* = 7.1, 1.8, 2H), 1.79 – 1.65 (m, 2H), 1.63 – 1.46 (m, 8H), 1.34 – 1.12 (m, 78H), 1.11 – 0.95 (m, 14H), 0.91 – 0.76 (m, 27H); **<sup>13</sup>C NMR** (101 MHz, CDCl<sub>3</sub>) δ 175.33, 173.24, 138.17, 137.95, 130.26, 128.38, 128.20, 128.17, 128.10, 127.82, 127.47, 127.10, 93.92, 91.28, 77.58, 77.42, 77.20, 75.60, 75.21, 74.57, 73.99, 71.29, 71.09, 70.78, 61.70, 61.23, 45.46, 45.39, 45.33, 45.02, 44.80, 41.58, 41.35, 40.48, 37.91, 37.88, 37.05, 36.43, 33.91, 32.12, 31.92, 30.06, 29.99, 29.76, 29.70, 29.67, 29.65, 29.52, 29.37, 29.36, 29.28, 29.20, 27.82, 27.48, 27.45, 27.41, 27.29, 27.17, 26.87, 24.91, 24.48, 22.69, 21.31, 21.20, 21.14, 21.01, 20.79, 20.60, 18.47, 17.77, 17.50, 17.45, 17.36, 17.26, 17.17, 17.14, 14.12, 14.05, 12.82, 12.70, 12.24, 12.02; **HRMS**-(ESI+) calculated for C<sub>91</sub>H<sub>162</sub>O<sub>14</sub>Si<sub>2</sub>Na [M + Na]<sup>+</sup> 1558.1401 Da, found 1558.1395 Da.

(2*S*,4*S*,6*S*,8*S*,10*R*,12*R*,14*R*,16*R*,17*R*)-((5*aR*,6*R*,8*R*,9*R*,9*aS*)-9-(benzyloxy)-6-((2*R*,3*R*,4*S*,5*R*,6*R*)-5-(benzyloxy)-6-(((2*S*,4*S*,6*S*,8*S*,10*R*,12*R*,14*R*,16*R*,17*R*)-17-(benzyloxy)-2,4,6,8,10,12,14,16-octamethyldotriacontanoyloxy)methyl)-4-((2*S*,4*S*,6*S*,8*S*,10*S*,12*S*,14*S*)-2,4,6,8,10,12,14-heptamethyltriacontanoyloxy)-3-(palmitoyloxy)tetrahydro-2H-pyran-2-yloxy)-2,2,4,4-tetraisopropyltetrahydro-5*aH*-pyrano[3,4-*f*][1,3,5,2,4]trioxadisilepin-8-yl)methyl 17-(benzyloxy)-2,4,6,8,10,12,14,16-octamethyldotriacontanoate (9):

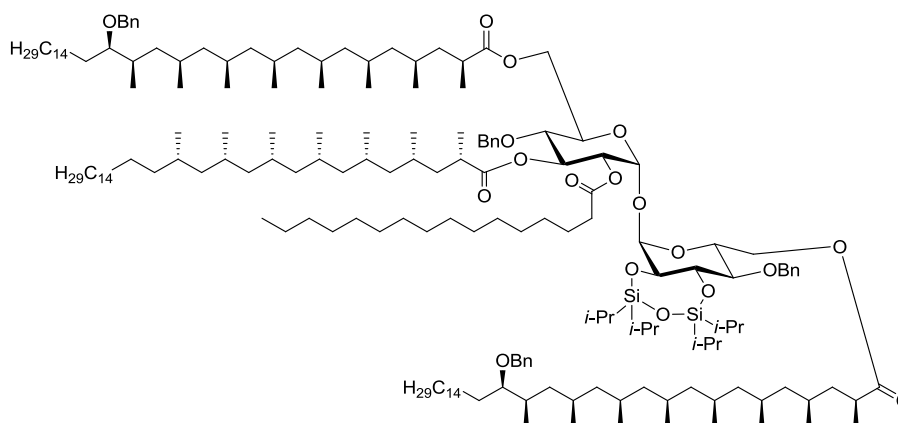

To a solution of diol **8** (27 mg, 0.018 mmol) in DCM (1 mL) was added EDC•HCl (2.1 eq, 7.1 mg, 0.037 mmol),

DMAP (4.1 eq, 8.8 mg, 0.072 mmol) and acid **5** (2.1 eq, 25.8 mg, 0.037 mmol)<sup>[1]</sup> at rt. The mixture was stirred for 16 h, after which TLC showed incomplete conversion. Additional EDC·HCl (6 eq) and DMAP (4 eq) were added and stirring was continued for 6 h. The reaction was diluted with EtOAc (5 mL), and the organic layer was washed with a sat. aq. NaHCO<sub>3</sub> solution (10 mL), brine (10 mL) and dried over MgSO<sub>4</sub>. After filtration, all volatiles were evaporated and the crude product was purified using flash column chromatography (silica, pentane/EtOAc 40:1) to afford **9** as a colorless oil (36 mg, 71% yield).

**<sup>1</sup>H NMR** (400 MHz, CDCl<sub>3</sub>) δ 7.37 – 7.17 (m, 20H), 5.65 (t, *J* = 9.6, 1H), 5.23 (d, *J* = 3.6, 1H), 5.06 (d, *J* = 3.7, 1H), 4.99 (d, *J* = 10.8, 1H), 4.93 (dd, *J* = 10.2, 3.6, 1H), 4.63 (d, *J* = 11.1, 1H), 4.54 (d, *J* = 10.9, 1H), 4.51 (s, 4H), 4.50 (d, *J* = 11.0, 1H), 4.33 – 4.24 (m, 5H), 4.15 (dd, *J* = 11.5, 1.6, 1H), 3.83 – 3.74 (m, 2H), 3.65 (t, *J* = 9.5, 1H), 3.37 (dd, *J* = 10.0, 8.5, 1H), 3.26 – 3.19 (m, 2H), 2.66 – 2.57 (m, 2H), 2.48 (q, *J* = 14.7, 6.9, 1H), 2.22 (t, *J* = 7.8, 1H), 1.85 – 1.76 (m, 4H), 1.75 – 1.66 (m, 2H), 1.65 – 1.38 (m, 24H), 1.35 – 1.12 (m, 153H), 1.11 – 0.94 (m, 18H), 0.93 – 0.73 (m, 81H); **<sup>13</sup>C NMR** (101 MHz, CDCl<sub>3</sub>) δ 176.70, 176.63, 175.20, 172.74, 139.35, 138.00, 137.57, 128.30, 128.19, 127.85, 127.70, 127.57, 127.51, 127.23, 126.97, 93.15, 90.62, 82.84, 78.38, 76.37, 75.38, 74.47, 74.05, 71.81, 71.42, 70.64, 69.07, 68.59, 62.61, 62.22, 52.62, 45.48, 45.38, 45.34, 45.27, 45.22, 45.22, 45.18, 45.02, 44.92, 44.89, 44.75, 40.68, 40.62, 40.54, 40.41, 38.73, 37.24, 37.12, 37.03, 36.44, 33.97, 31.93, 30.76, 30.07, 29.99, 29.89, 29.76, 29.70, 29.68, 29.66, 29.52, 29.38, 29.38, 29.36, 29.26, 29.20, 28.12, 28.10, 27.87, 27.79, 27.65, 27.53, 27.47, 27.44, 27.40, 27.36, 27.34, 27.14, 27.10, 26.88, 26.20, 24.56, 22.69, 21.58, 21.48, 21.41, 21.31, 21.19, 21.17, 21.14, 20.96, 20.82, 20.81, 20.71, 20.64, 20.60, 18.47, 18.38, 17.75, 17.50, 17.45, 17.41, 17.30, 17.23, 17.17, 15.69, 14.12, 12.84, 12.77, 12.33, 12.06; **HRMS**-(APPI+) calculated for C<sub>185</sub>H<sub>330</sub>O<sub>18</sub>Si<sub>2</sub>Na [M + Na]<sup>+</sup> 2921.4405 Da, found 2921.4186 Da.

**(2*S*,4*S*,6*S*,8*S*,10*R*,12*R*,14*R*,16*R*,17*R*)-((2*R*,3*R*,4*S*,5*R*,6*R*)-3-(benzyloxy)-6-((2*R*,3*R*,4*R*,5*S*,6*R*)-5-(benzyloxy)-6-(((2*S*,4*S*,6*S*,8*S*,10*R*,12*R*,14*R*,16*R*,17*R*)-17-(benzyloxy)-2,4,6,8,10,12,14,16-octamethyldotriacontanoyloxy)methyl)-3,4-dihydroxytetrahydro-2H-pyran-2-yloxy)-4-((2*S*,4*S*,6*S*,8*S*,10*S*,12*S*,14*S*)-2,4,6,8,10,12,14-heptamethyltriacontanoyloxy)-5-(palmitoyloxy)tetrahydro-2H-pyran-2-yl)methyl 17-(benzyloxy)-2,4,6,8,10,12,14,16-octamethyldotriacontanoate (**12**):**

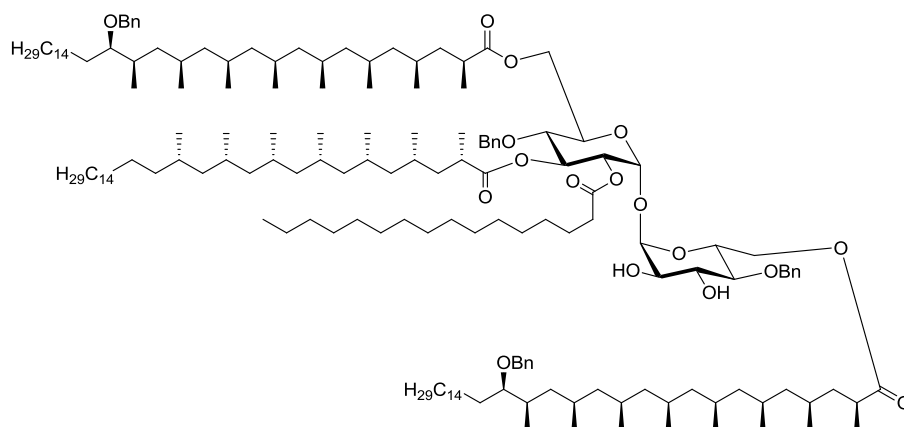

To compound **9** (32 mg, 0.011 mmol) in THF (0.5 mL), was added TBAF (40 eq, 0.44 mL, 1 M solution in THF, acidified to pH = 6.5 with TFA). The mixture was heated to 40 °C for 24 h and then EtOAc (2 mL) was added. The organic layer was washed with water (2 mL) and subsequently dried over MgSO<sub>4</sub>. After filtration, the solvent was evaporated, and the product was purified using flash column chromatography (pentane/EtOAc 5:1) to afford **12** (25 mg, 84% yield) as a colorless oil.

**<sup>1</sup>H NMR** (400 MHz, CDCl<sub>3</sub>) δ 7.36 – 7.20 (m, 20H), 5.61 (t, *J* = 9.7, 1H), 5.25 (d, *J* = 3.3, 1H), 5.10 (d, *J* = 3.4, 1H), 4.96 (dd, *J* = 10.2, 3.5, 1H), 4.82 (d, *J* = 11.2, 1H), 4.70 – 4.59 (m, 2H), 4.53 (d, *J* = 11.0, 1H), 4.51 (s, 4H), 4.36 (d, *J* = 11.5, 1H), 4.25 – 4.17 (m, 4H), 4.01 (t, *J* = 8.9, 1H), 3.82 – 3.76 (m, 1H), 3.66 (t, *J* = 9.5, 1H), 3.61 –

3.51 (m, 1H), 3.40 (t,  $J = 9.1$ , 1H), 3.26 – 3.18 (m, 2H), 2.69 – 2.55 (m, 3H), 2.51 (q,  $J = 13.9$ , 7.0, 1H), 2.33 (d,  $J = 7.6$ , 1H), 2.23 (t,  $J = 7.8$ , 2H), 1.89 – 1.71 (m, 4H), 1.64 – 1.36 (m, 24H), 1.35 – 1.12 (m, 130H), 1.12 – 0.96 (m, 14H), 0.95 – 0.74 (m, 81H);  $^{13}\text{C}$  NMR (101 MHz,  $\text{CDCl}_3$ )  $\delta$  176.65, 176.58, 175.80, 172.59, 139.34, 137.95, 137.05, 128.53, 128.47, 128.19, 128.01, 127.95, 127.82, 127.66, 127.57, 127.24, 93.51, 91.28, 82.84, 77.72, 77.20, 76.37, 74.84, 74.42, 71.98, 71.81, 71.30, 70.36, 69.58, 69.00, 62.44, 62.20, 45.39, 45.31, 45.26, 45.22, 45.17, 45.02, 44.89, 44.70, 40.74, 40.63, 40.54, 37.26, 37.16, 37.03, 36.44, 33.94, 32.88, 31.92, 31.90, 30.76, 30.07, 29.99, 29.89, 29.76, 29.70, 29.68, 29.66, 29.56, 29.51, 29.42, 29.36, 29.33, 29.30, 29.24, 28.14, 28.10, 27.88, 27.80, 27.66, 27.54, 27.47, 27.46, 27.37, 27.36, 27.21, 27.15, 27.12, 26.88, 26.55, 26.20, 25.86, 24.63, 22.69, 21.58, 21.49, 21.42, 21.32, 21.25, 21.19, 21.15, 21.13, 20.85, 20.82, 20.80, 20.71, 20.64, 20.60, 18.44, 18.35, 17.67, 17.07, 17.05, 15.69, 14.12, 14.10, 13.05, 13.03; HRMS-(ESI+) calculated for  $\text{C}_{173}\text{H}_{304}\text{O}_{17}\text{Na}_2$  [ $\text{M} + 2\text{Na}$ ] $^+$  2700.2719 Da, found 2700.2637 Da.

#### Compound 14:

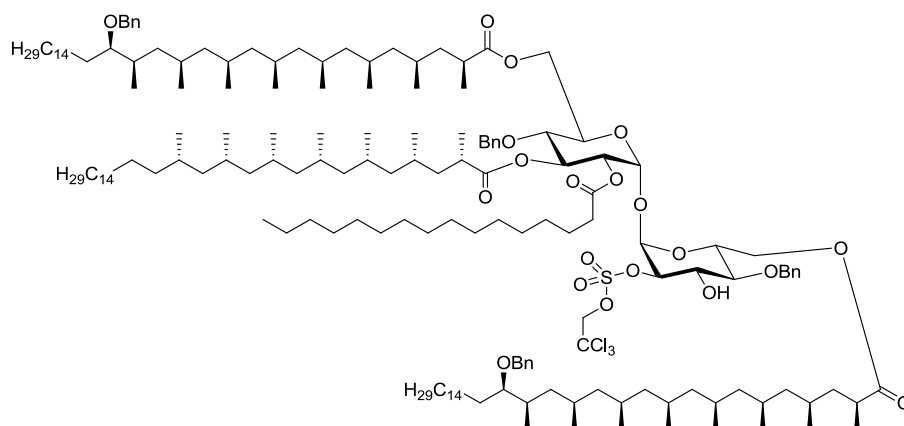

To **12** (24 mg, 9.7  $\mu\text{mol}$ ) in DCM (1 mL) was added imidazolium salt **13** (2 eq, 8.3 mg, 0.018 mmol, prepared according to a previously reported procedure).<sup>[2]</sup> The mixture was cooled to 0  $^{\circ}\text{C}$  and 1,2-dimethylimidazole (2.8 eq, 2.4 mg, 0.025 mmol) was added as a solution in DCM (0.5 mL) over 4 h. The reaction was allowed to reach rt, after which it was stirred for 24 h, and more imidazolium (0.5 eq) salt was added. After an additional 48 h the mixture was diluted with DCM (3 mL) and the organic layer was washed with brine (2 mL). The organic layer was dried over  $\text{MgSO}_4$ , filtered and all volatiles were evaporated. The product was purified using flash chromatography (pentane/EtOAc 20:1) to afford **14** as a colorless oil (15 mg, 58% yield).

$^1\text{H}$  NMR (400 MHz,  $\text{CDCl}_3$ )  $\delta$  7.40 – 7.17 (m, 20H), 5.59 (t,  $J = 9.7$ , 1H), 5.39 (d,  $J = 3.1$ , 1H), 5.22 (d,  $J = 3.3$ , 1H), 4.98 (dd,  $J = 10.2$ , 3.2, 1H), 4.86, 4.75 (AB- $\text{CH}_2\text{CCl}_3$ ,  $J = 10.8$ , 2H), 4.70 (s, 2H), 4.59, 4.54 (AB system,  $J = 10.7$ , 2H), 4.52 – 4.48 (m, 5H), 4.42 – 4.20 (m, 5H), 4.17 (d,  $J = 10.2$ , 1H), 3.91 (d,  $J = 7.3$ , 1H), 3.70 (t,  $J = 9.6$ , 1H), 3.47 (t,  $J = 9.3$ , 1H), 3.24 – 3.19 (m, 2H), 2.69 – 2.60 (m, 2H), 2.52 – 2.45 (m, 2H), 2.25 – 2.18 (m, 2H), 1.85 – 1.73 (m, 4H), 1.65 – 1.35 (m, 24H), 1.35 – 1.13 (m, 130H), 1.08 – 0.97 (m, 14H), 0.93 – 0.74 (m, 81H);  $^{13}\text{C}$  NMR (101 MHz,  $\text{CDCl}_3$ )  $\delta$  176.54, 176.50, 175.68, 172.43, 139.35, 137.28, 137.17, 128.81, 128.40, 128.19, 127.86, 127.57, 127.24, 92.64, 92.48, 92.02, 82.84, 81.03, 79.91, 78.43, 75.94, 75.30, 74.04, 71.81, 70.99, 70.67, 70.30, 69.35, 69.23, 61.88, 61.80, 45.38, 45.33, 45.30, 45.26, 45.22, 45.17, 45.01, 44.92, 44.83, 44.65, 40.67, 40.62, 40.54, 37.23, 37.18, 36.99, 36.44, 33.93, 32.88, 31.93, 30.76, 30.07, 29.99, 29.95, 29.90, 29.85, 29.82, 29.76, 29.70, 29.68, 29.66, 29.51, 29.36, 29.34, 29.32, 29.27, 28.14, 27.87, 27.80, 27.64, 27.53, 27.47, 27.35, 27.23, 27.12, 26.88, 26.20, 24.62, 22.69, 21.58, 21.48, 21.41, 21.33, 21.27, 21.17, 20.83, 20.81, 20.72, 20.66, 20.61, 18.49, 18.39, 17.58, 15.69, 14.12; HRMS-(ESI-) calculated for  $\text{C}_{175}\text{H}_{305}\text{Cl}_3\text{O}_{20}\text{S}$  [ $\text{M} - \text{H}$ ] $^-$  2866.1556 Da, found 2866.1323 Da.

**Sulfolipid-1 (1):**

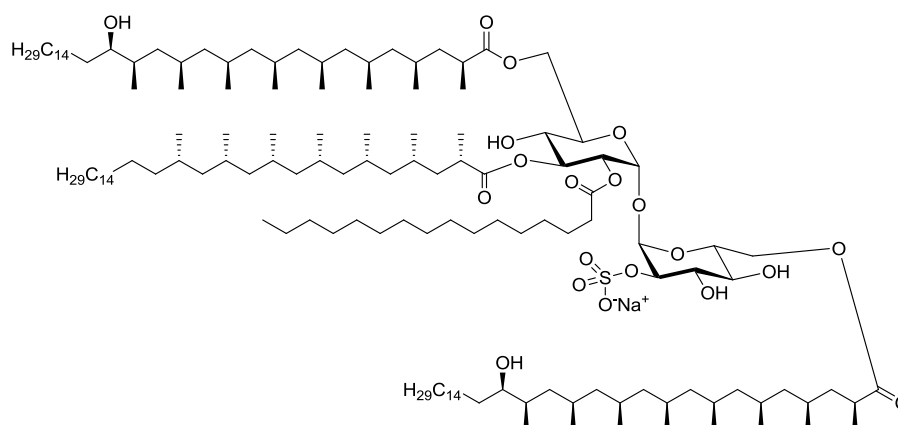

To a solution of **14** (13 mg, 4.5  $\mu$ mol) in DCM/MeOH (1:1, 1.2 mL) was added ammonium formate (15 eq, 4.3 mg, 0.07 mmol). After everything had dissolved, Pd(OH)<sub>2</sub> (1.2 eq, 3.8 mg, 20% weight on carbon) was added. The mixture was placed under a H<sub>2</sub> atmosphere (1 bar, balloon) using three vacuum/N<sub>2</sub> cycles followed by four vacuum/H<sub>2</sub> cycles. After 16 h, TLC showed complete conversion of the starting material and the mixture was filtered over Celite and concentrated. <sup>1</sup>H NMR spectroscopy showed complete removal of the TCE group but incomplete deprotection of the benzyl ethers. The crude product was redissolved in DCM (0.5 mL) and MeOH (1 mL). Pd(OH)<sub>2</sub> (1.2 eq, 11 mg) was added and the reaction was placed under a H<sub>2</sub> atmosphere (1 bar, balloon) and left for 48 h. After this period, TLC indicated the formation of multiple products. <sup>1</sup>H NMR still indicated the presence of benzyl ethers. The procedure was repeated, first with 250 psi of hydrogen for 3 h (little change) and then at 500 psi for 3 h in a Parr bomb. After this, <sup>1</sup>H NMR showed complete removal of all protecting groups, however with substantial amounts of side products. The crude product was flushed over a DOWEX Na<sup>+</sup> ion-exchange column (DCM/MeOH 9:1) and further purified by flash column chromatography (silica, first DCM/MeOH 99:1, then DCM/MeOH 97:3). **1** was obtained as a glass-like colorless oil (1.6 mg, 15%).

**<sup>1</sup>H NMR** (400 MHz, CDCl<sub>3</sub>/MeOD - 4:1)  $\delta$  5.28 (d,  $J$  = 3.8, 1H), 5.25 (t,  $J$  = 9.7, 1H), 5.07 (d,  $J$  = 3.5, 1H), 4.77 (dd,  $J$  = 10.2, 3.5, 1H), 4.27, 4.21 (AB system,  $J$  = 12.2, 2H), 4.14 – 4.06 (m, 4H), 3.78 (t,  $J$  = 9.5, 1H), 3.68 – 3.63 (m, 1H), 3.44 (t,  $J$  = 10.1, 1H), 3.33 – 3.27 (m, 2H), 3.24 (t,  $J$  = 9.2, 1H), 2.55 – 2.42 (m, 3H), 2.20 – 2.10 (m, 3H), 1.64 – 1.55 (m, 4H), 1.50 – 1.35 (m, 20H), 1.33 – 0.95 (m, 147H), 0.92 – 0.63 (m, 81H); **HRMS**-(ESI<sup>-</sup>) calculated for C<sub>145</sub>H<sub>279</sub>O<sub>20</sub>S [M – Na]<sup>-</sup> 2374.0564 Da, found 2374.0462 Da.

**Desulfated side-product, isolated after the conversion of 14 to 1.**

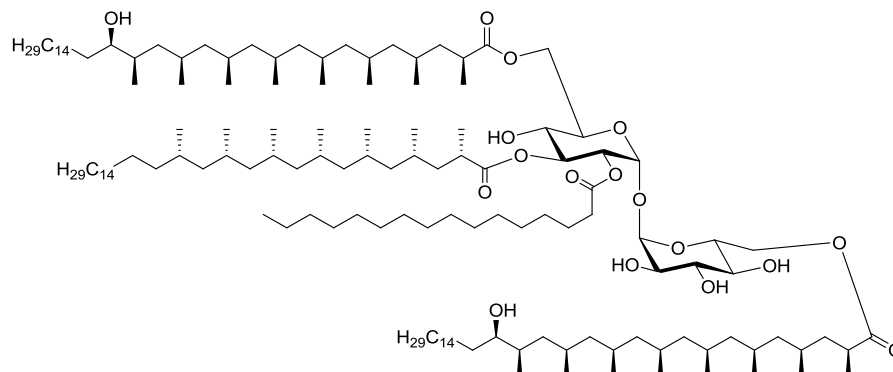

**<sup>1</sup>H NMR** (400 MHz, CDCl<sub>3</sub>) 5.39 (t,  $J$  = 9.4, 1H), 5.28 (d,  $J$  = 2.6, 1H), 5.12 (d,  $J$  = 2.7, 1H), 4.95 (dd,  $J$  = 10.0, 2.7, 1H), 4.49 (dd,  $J$  = 12.4, 4.0, 1H), 4.40 (dd,  $J$  = 12.8, 4.1, 1H), 4.34 – 4.28 (m, 1H), 4.17 – 4.06 (m, 2H), 3.92 (t,  $J$  = 8.7, 1H), 3.78 – 3.71 (m, 1H), 3.63 – 3.56 (m, 1H), 3.54 – 3.44 (m, 3H), 3.36 – 3.23 (m, 3H), 2.68 – 2.55 (m, 3H),

2.29 – 2.18 (m, 3H), 1.82 – 1.70 (m, 4H), 1.68 – 1.38 (m, 22H), 1.35 – 0.97 (m, 145H), 0.93 – 0.77 (m, 81H);

**HRMS**-(ESI+) calculated for C<sub>145</sub>H<sub>281</sub>O<sub>17</sub> [M + H]<sup>+</sup> 2296.1152 Da, found 2296.0999 Da.

[1] D. Geerdink, B. ter Horst, M. Lepore, L. Mori, G. Puzo, A. K. H. Hirsch, M. Gilleron, G. de Libero and A. J. Minnaard, *Chem. Sci.* 2013, 709-716

[2] A. Y. Desoky and S. D. Taylor, *J. Org. Chem.* 2009, 74, 9406-9412.

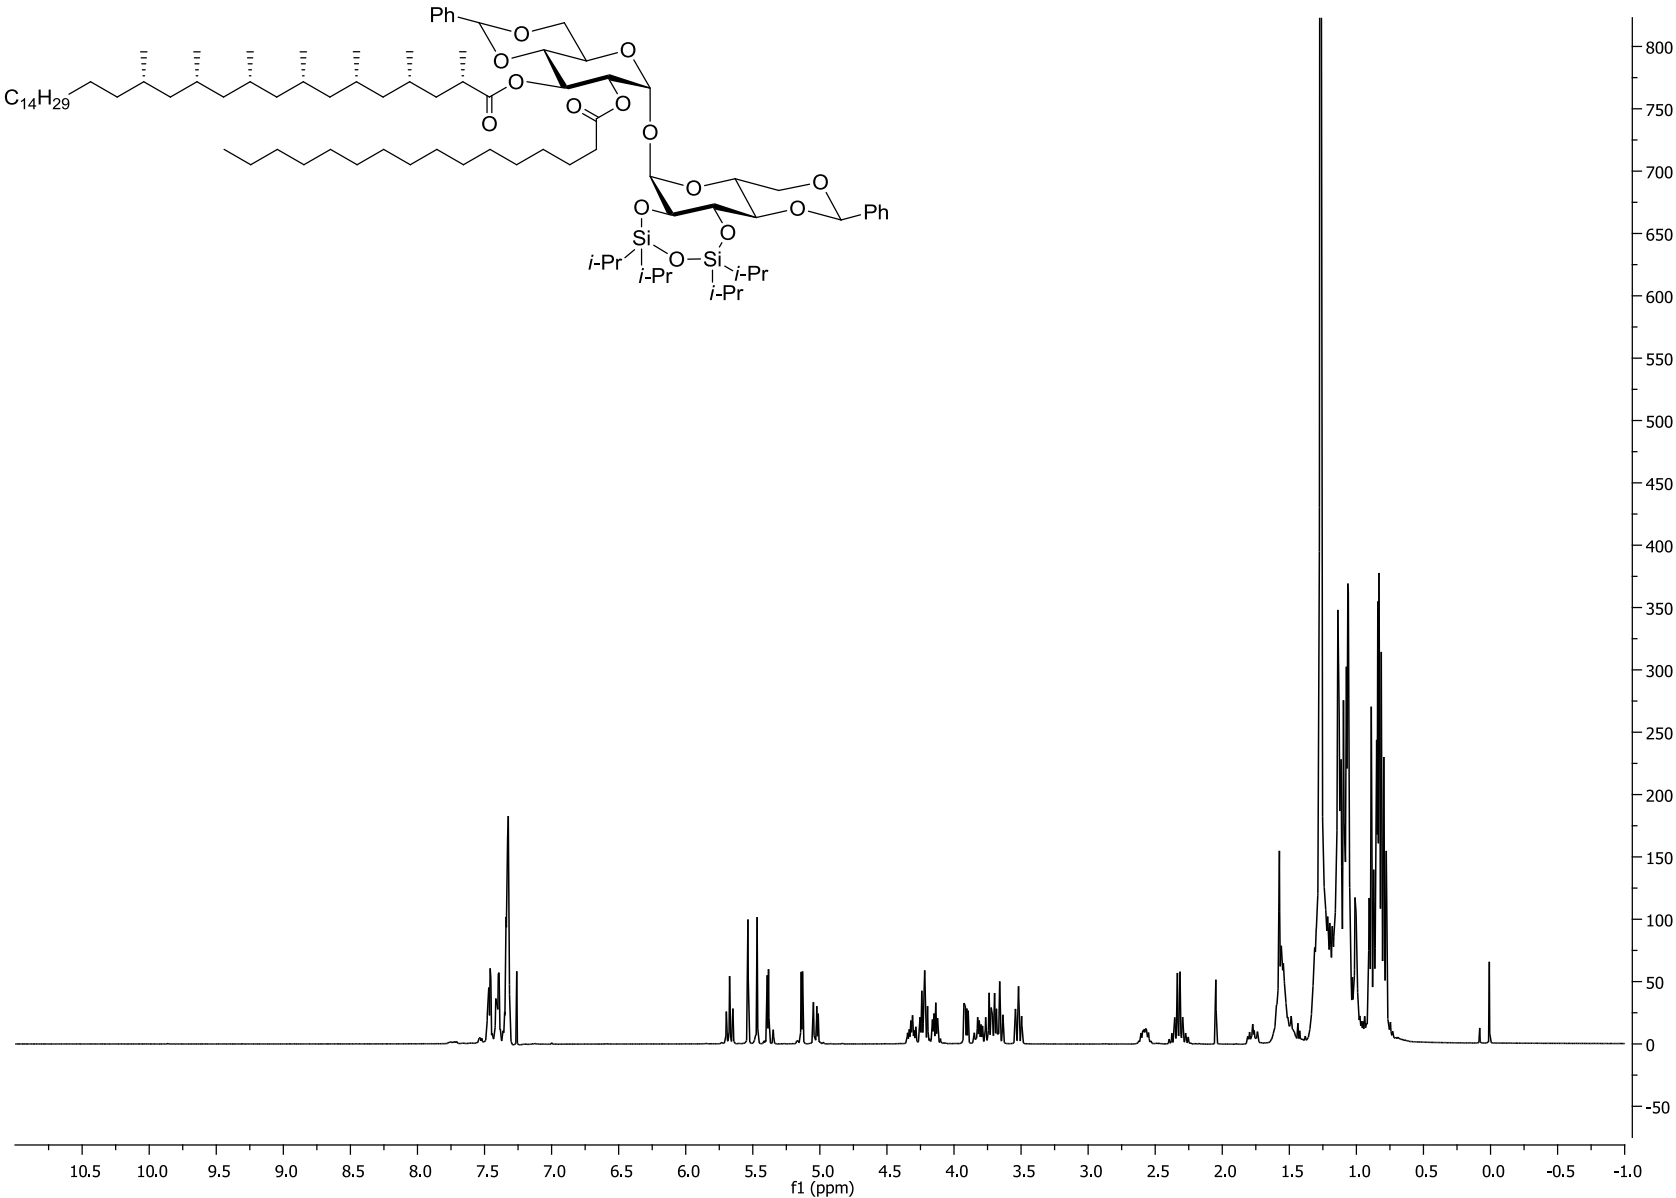

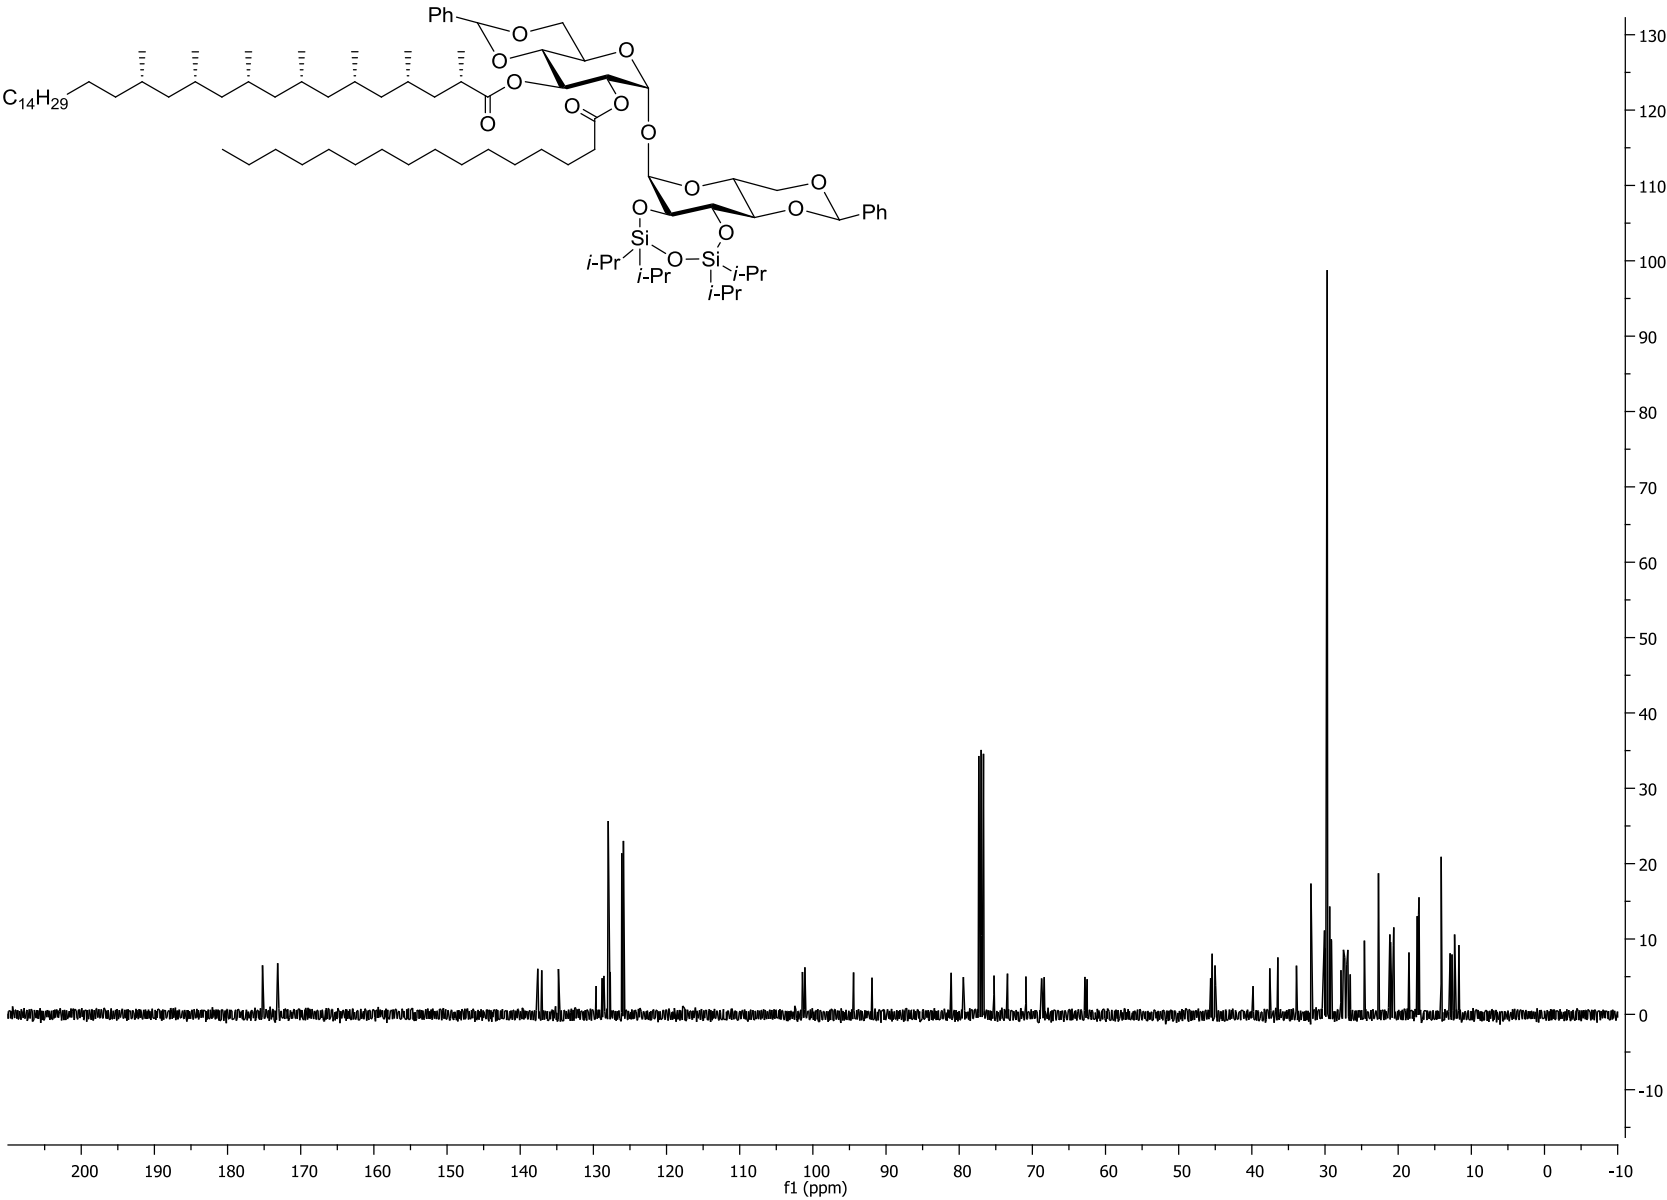



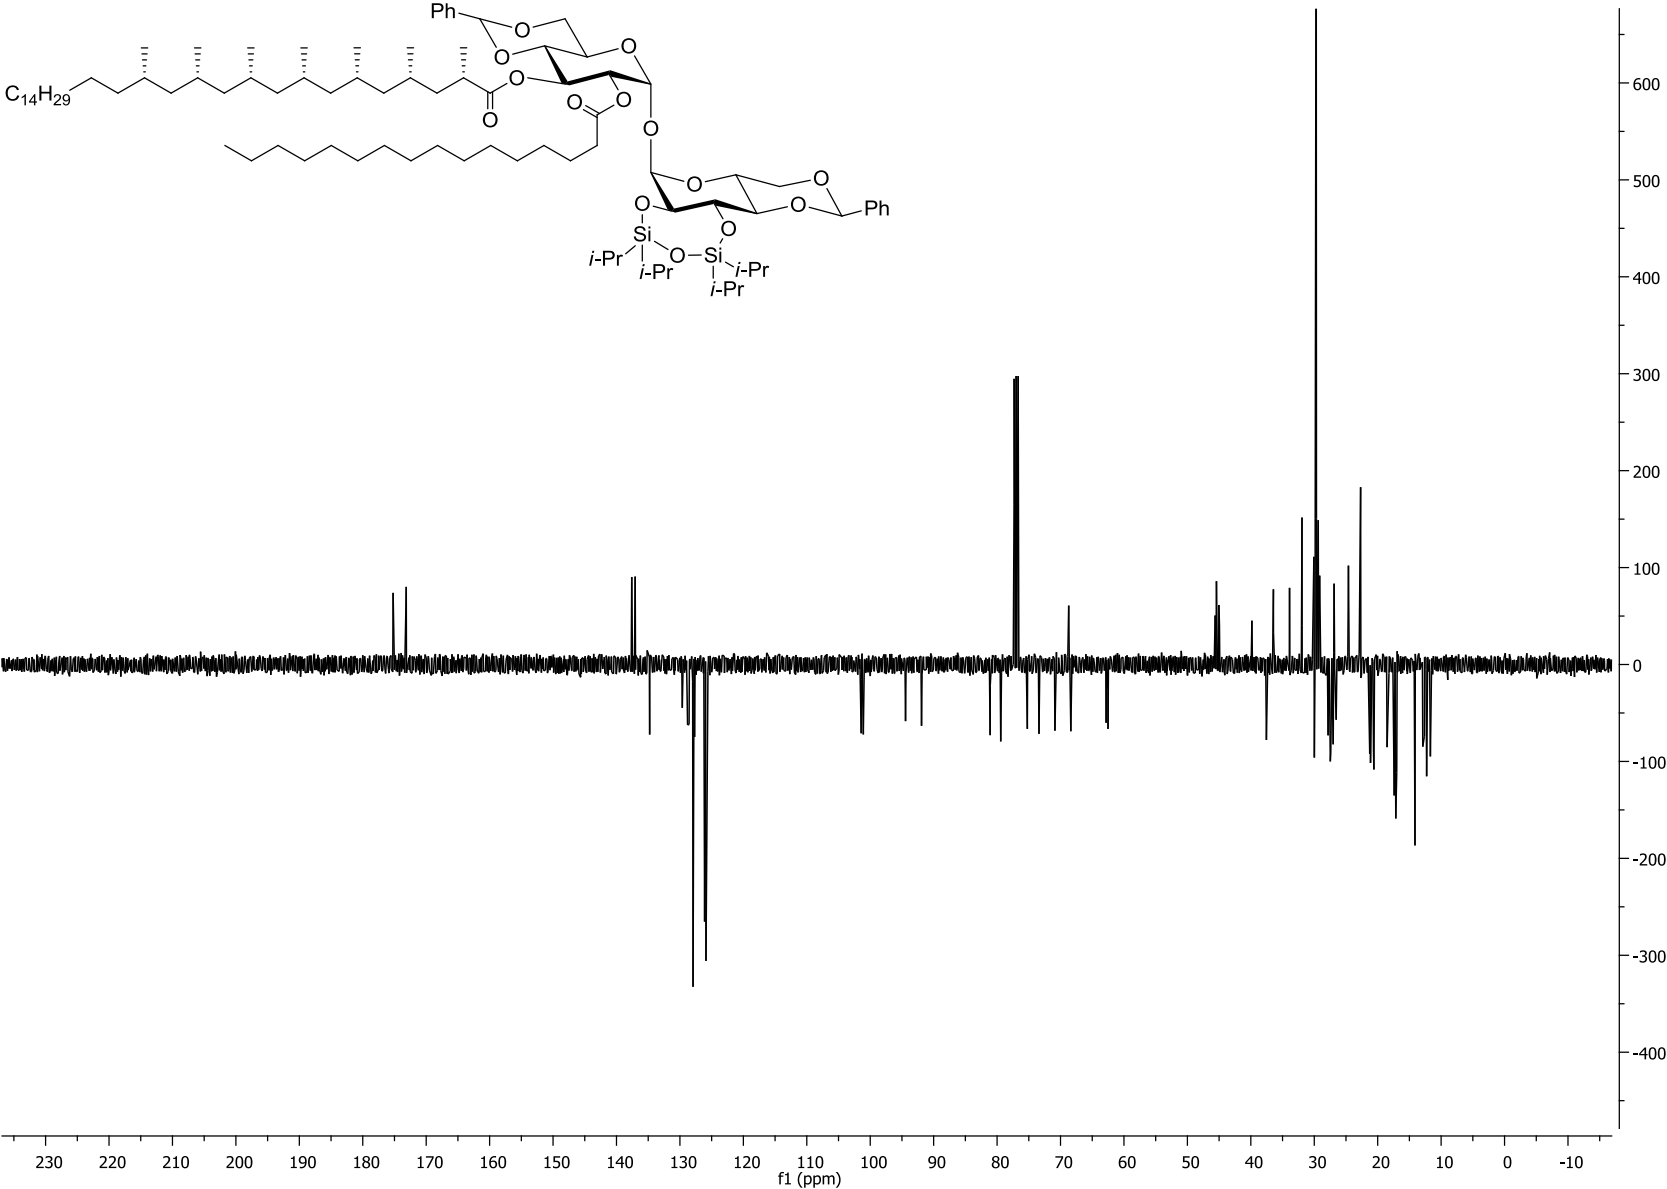

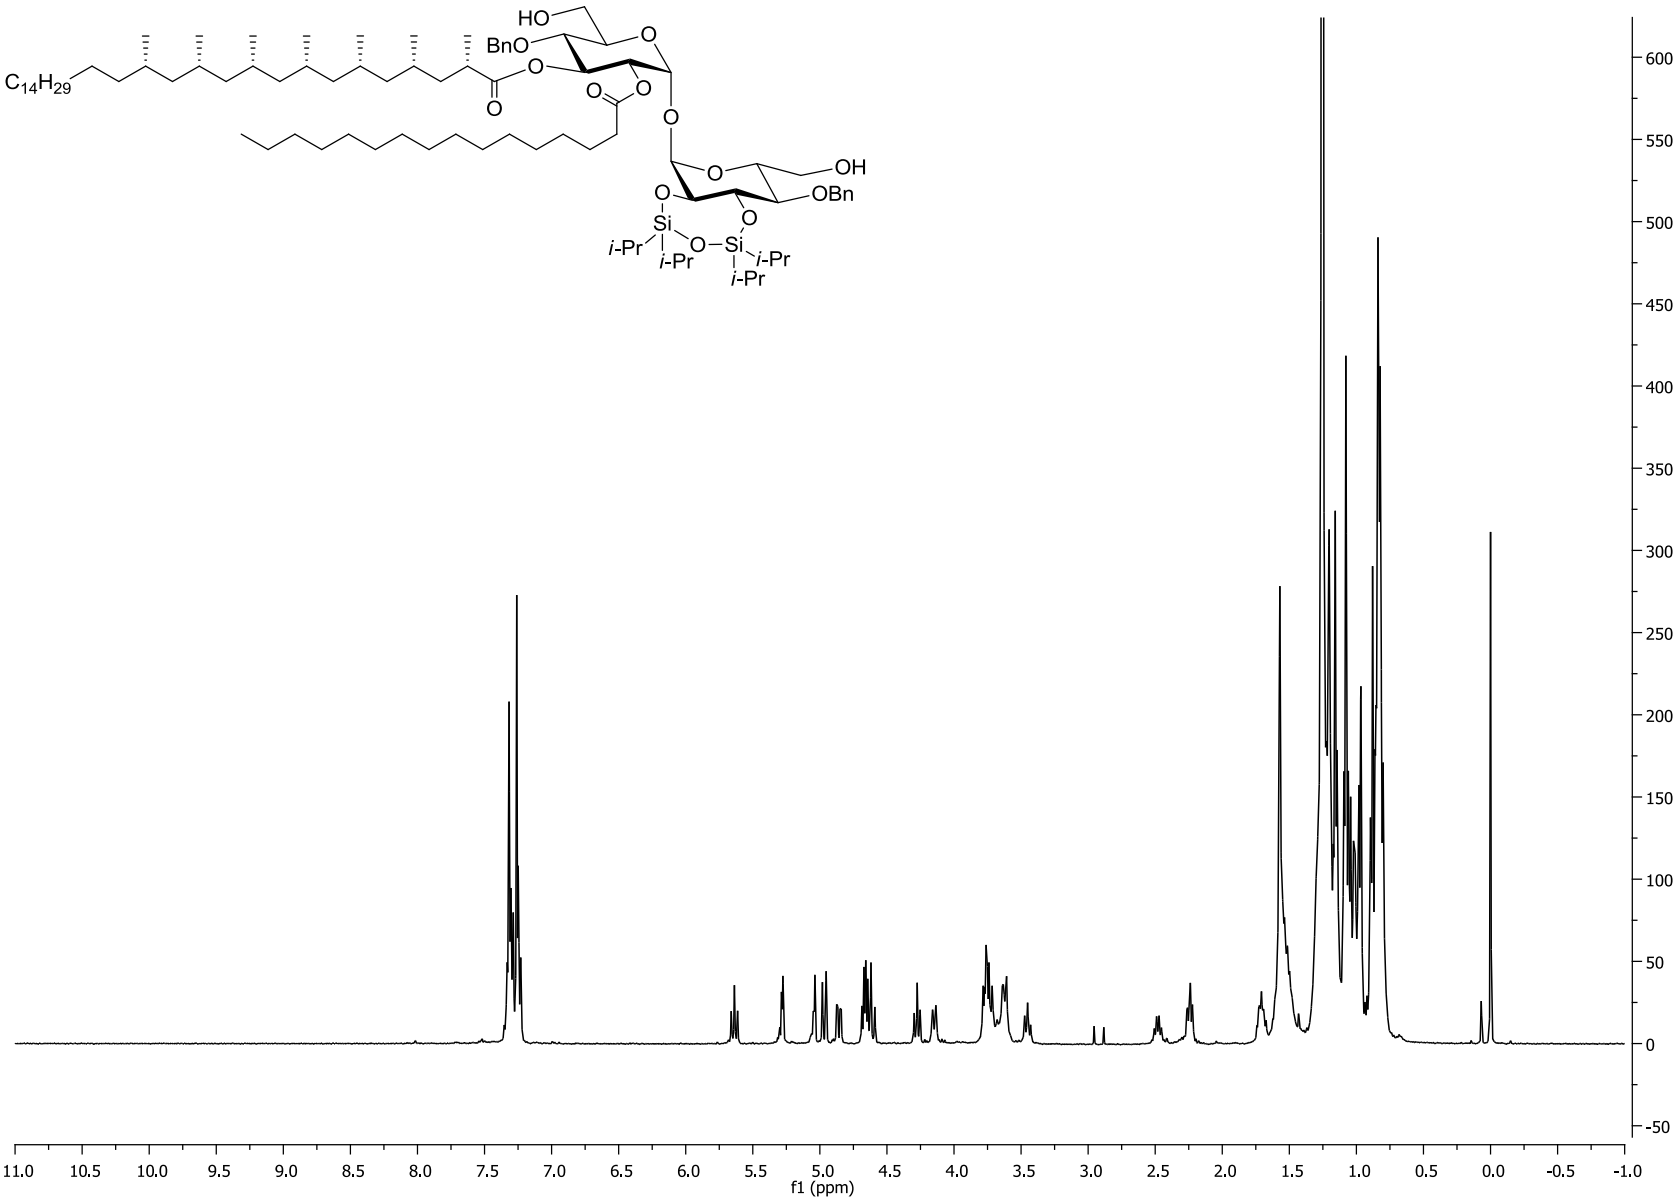

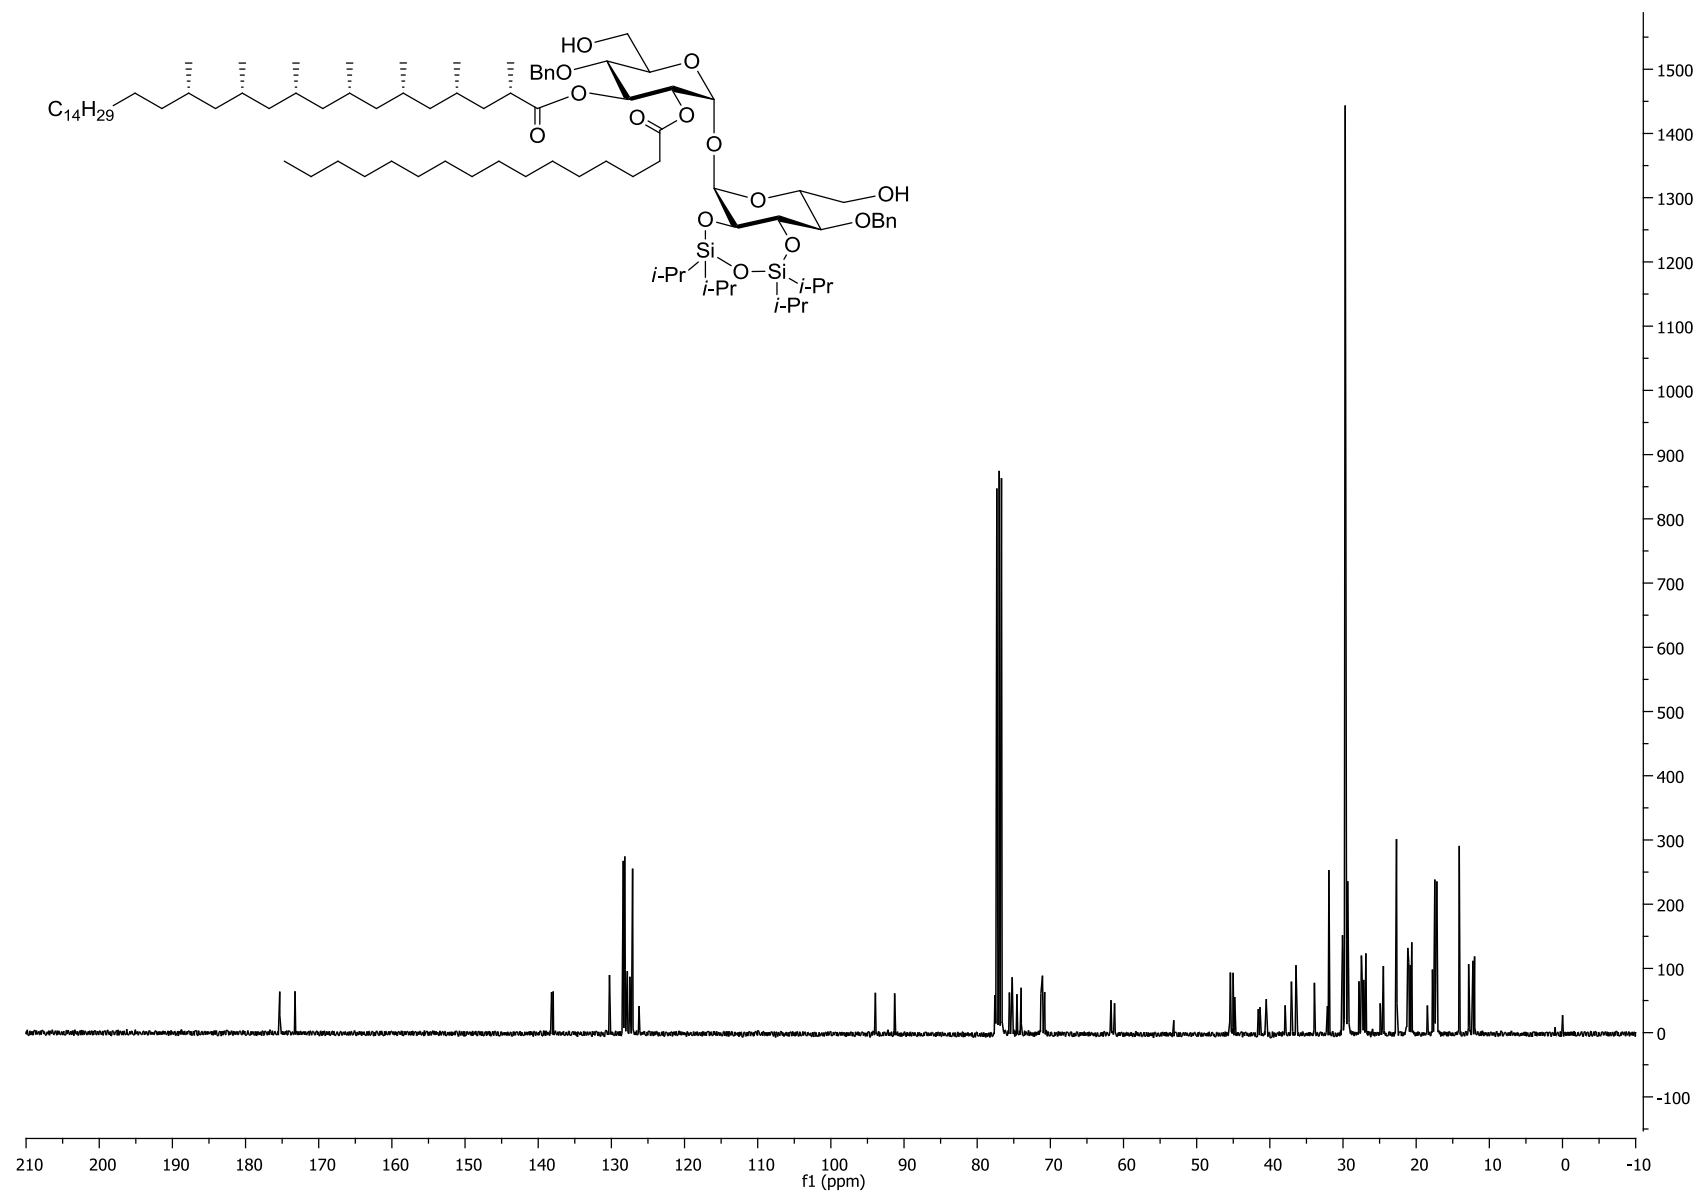

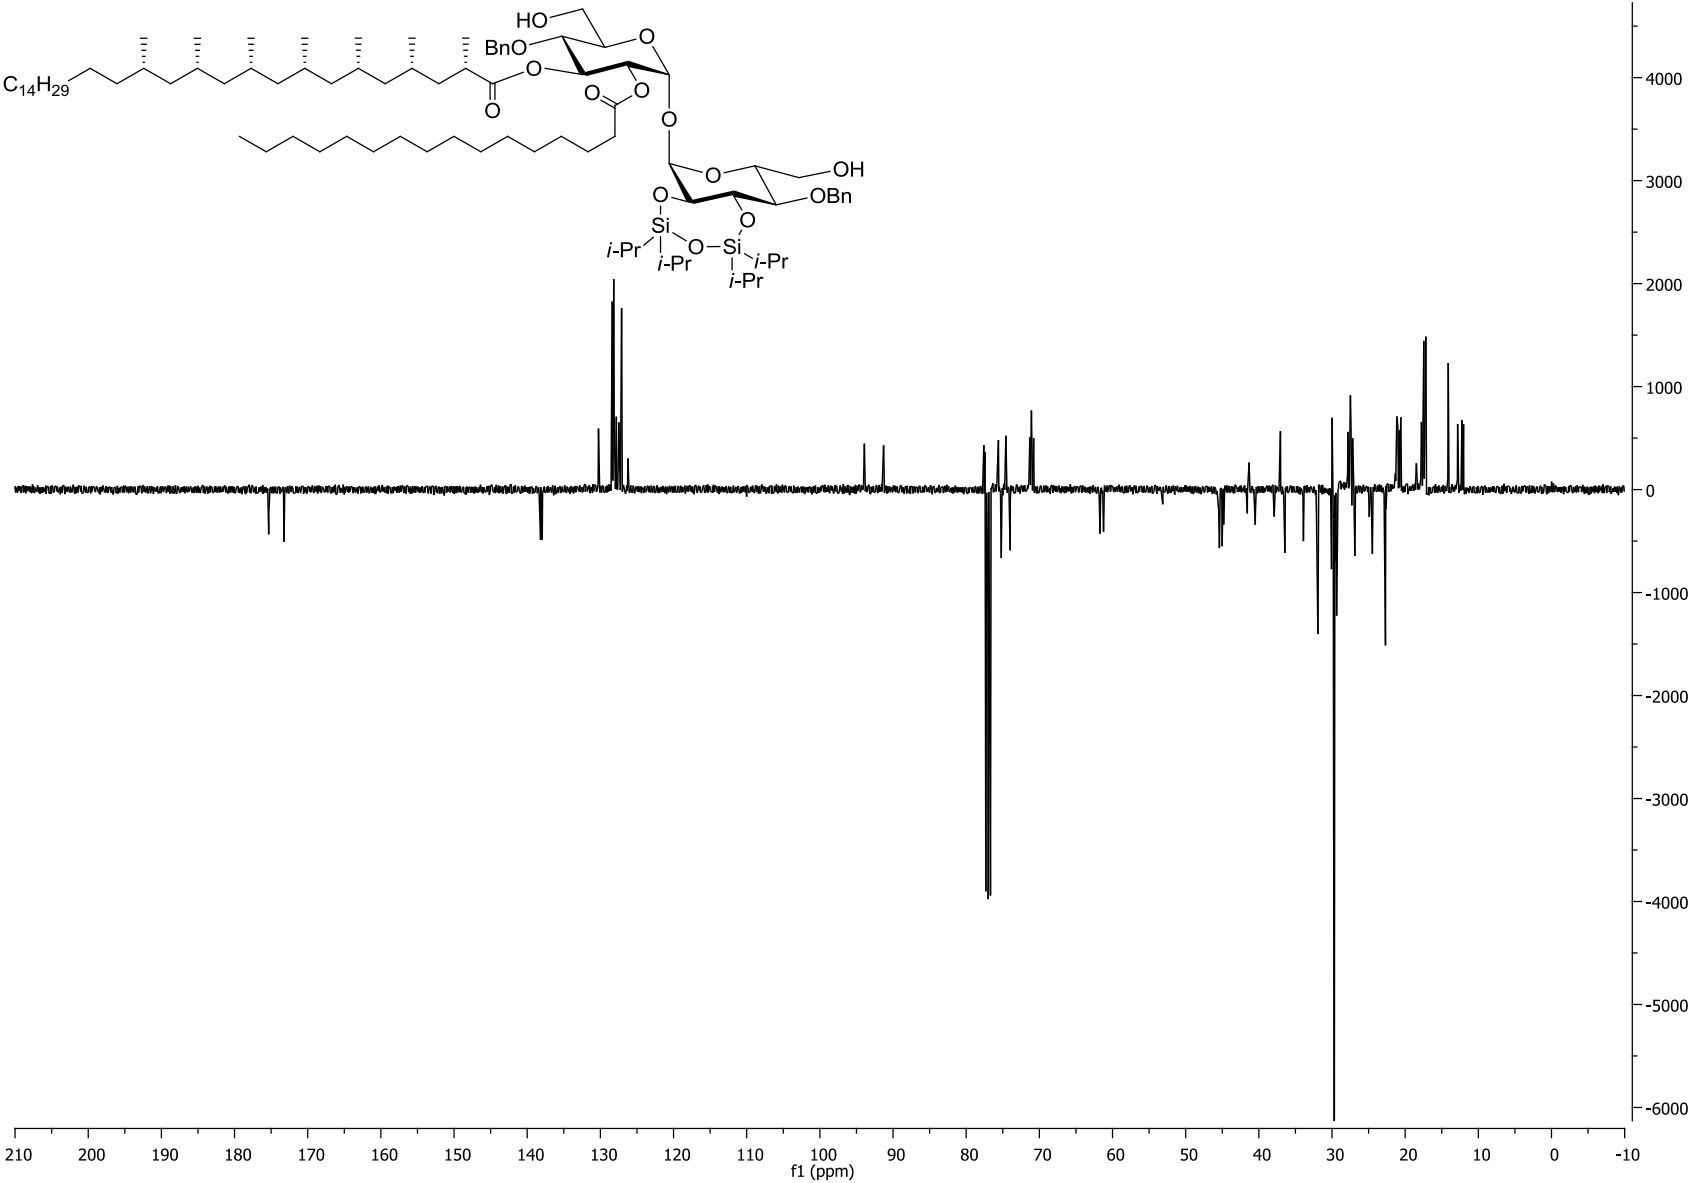

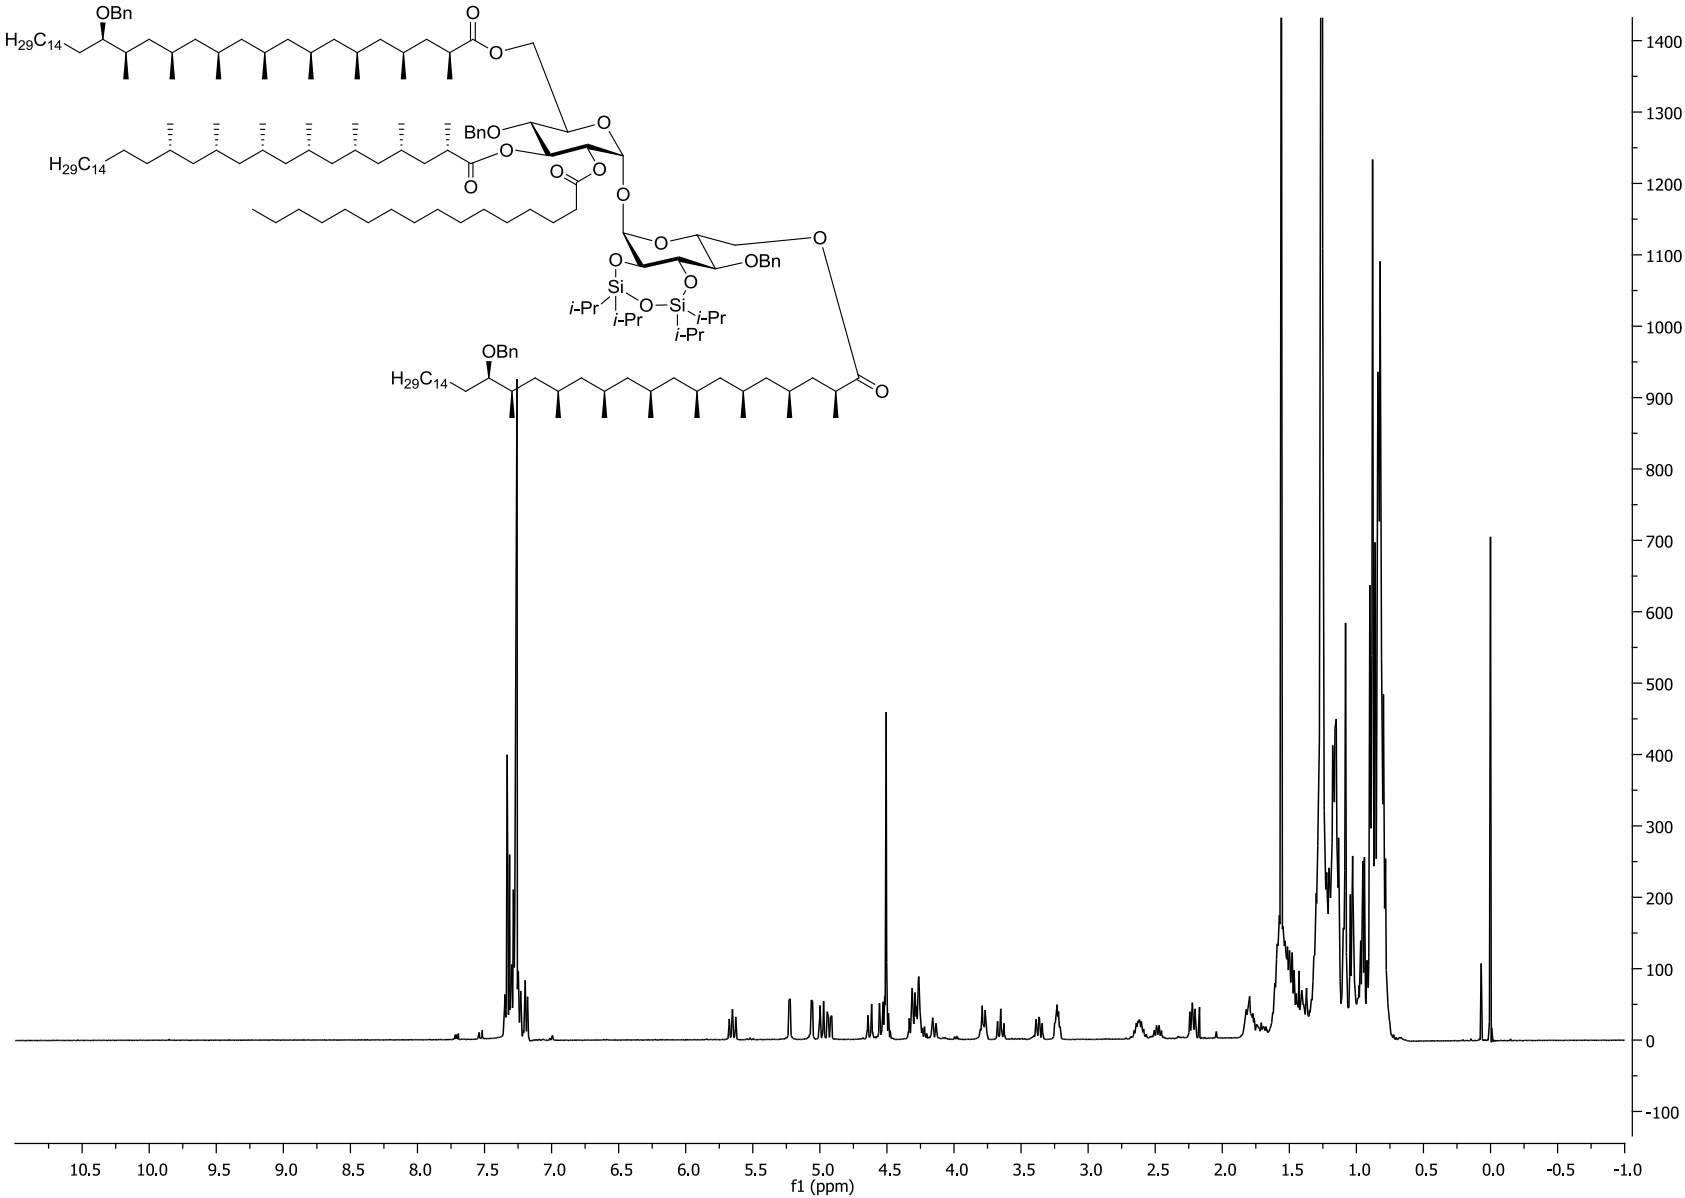

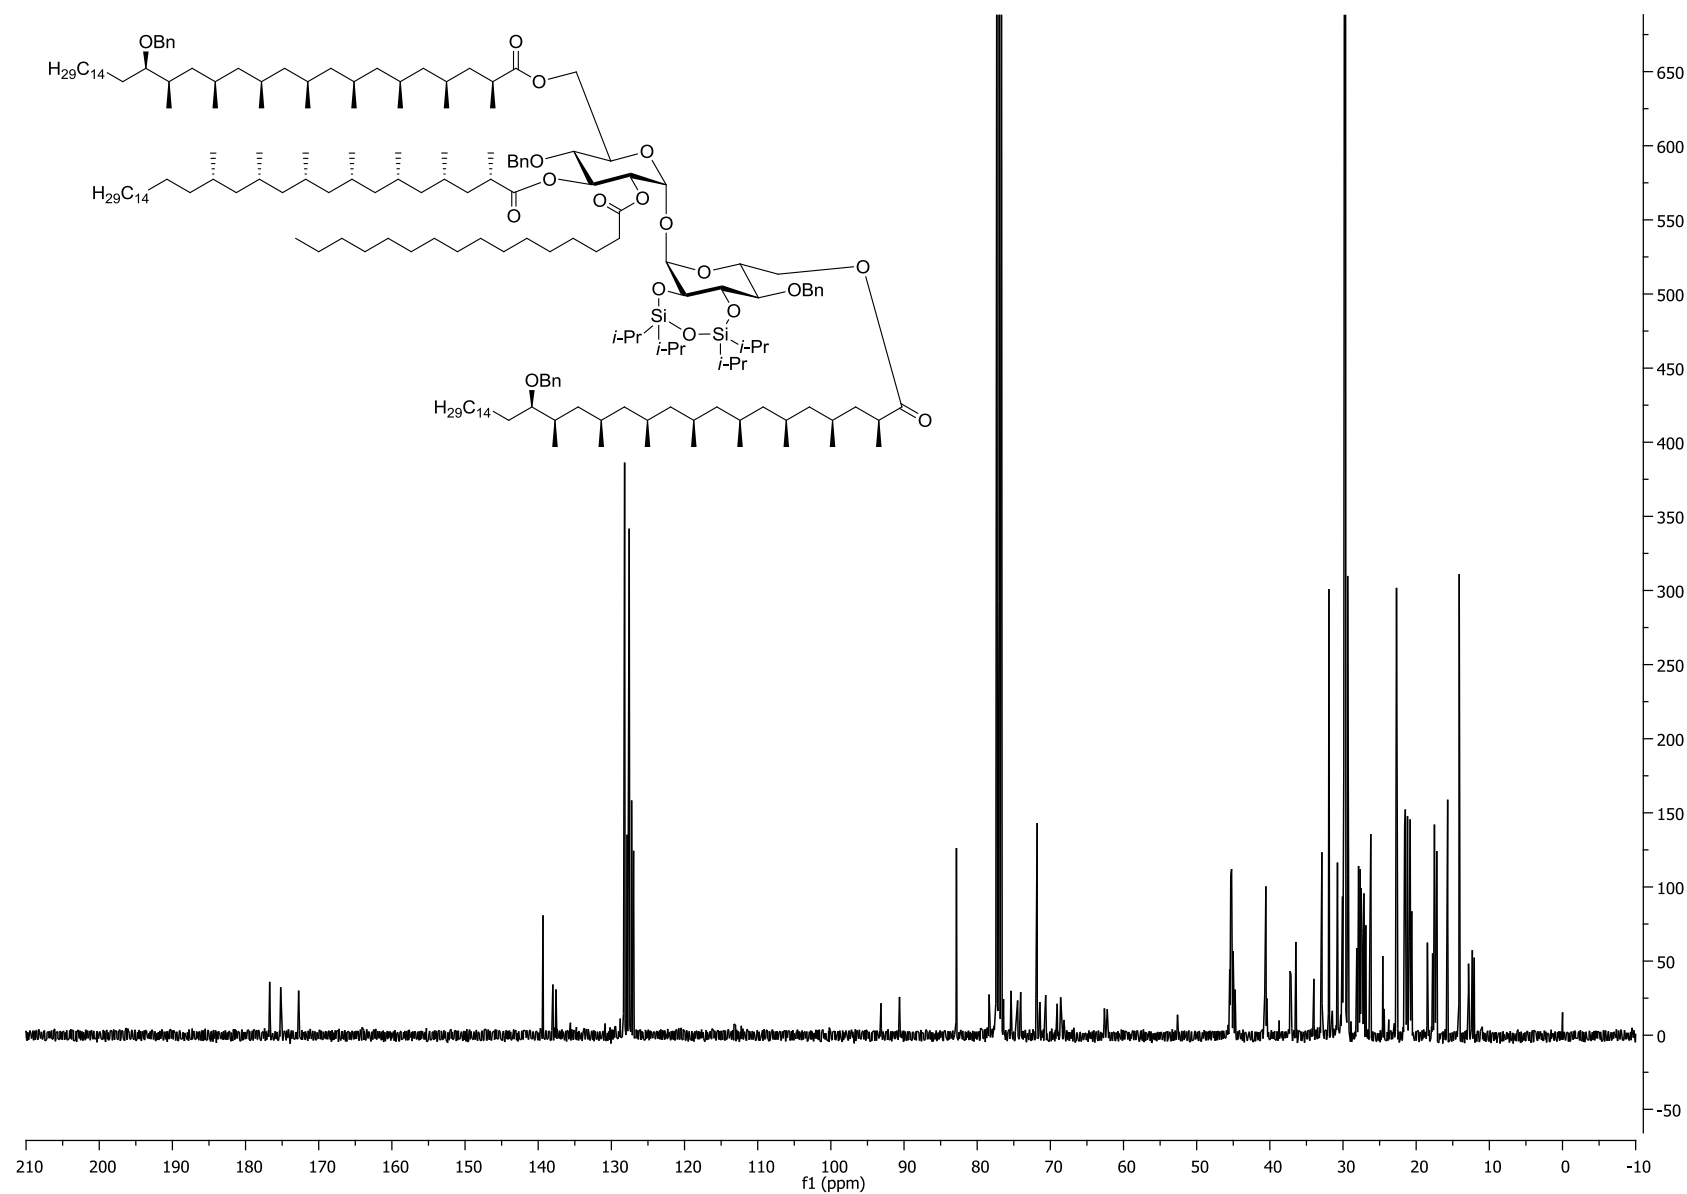

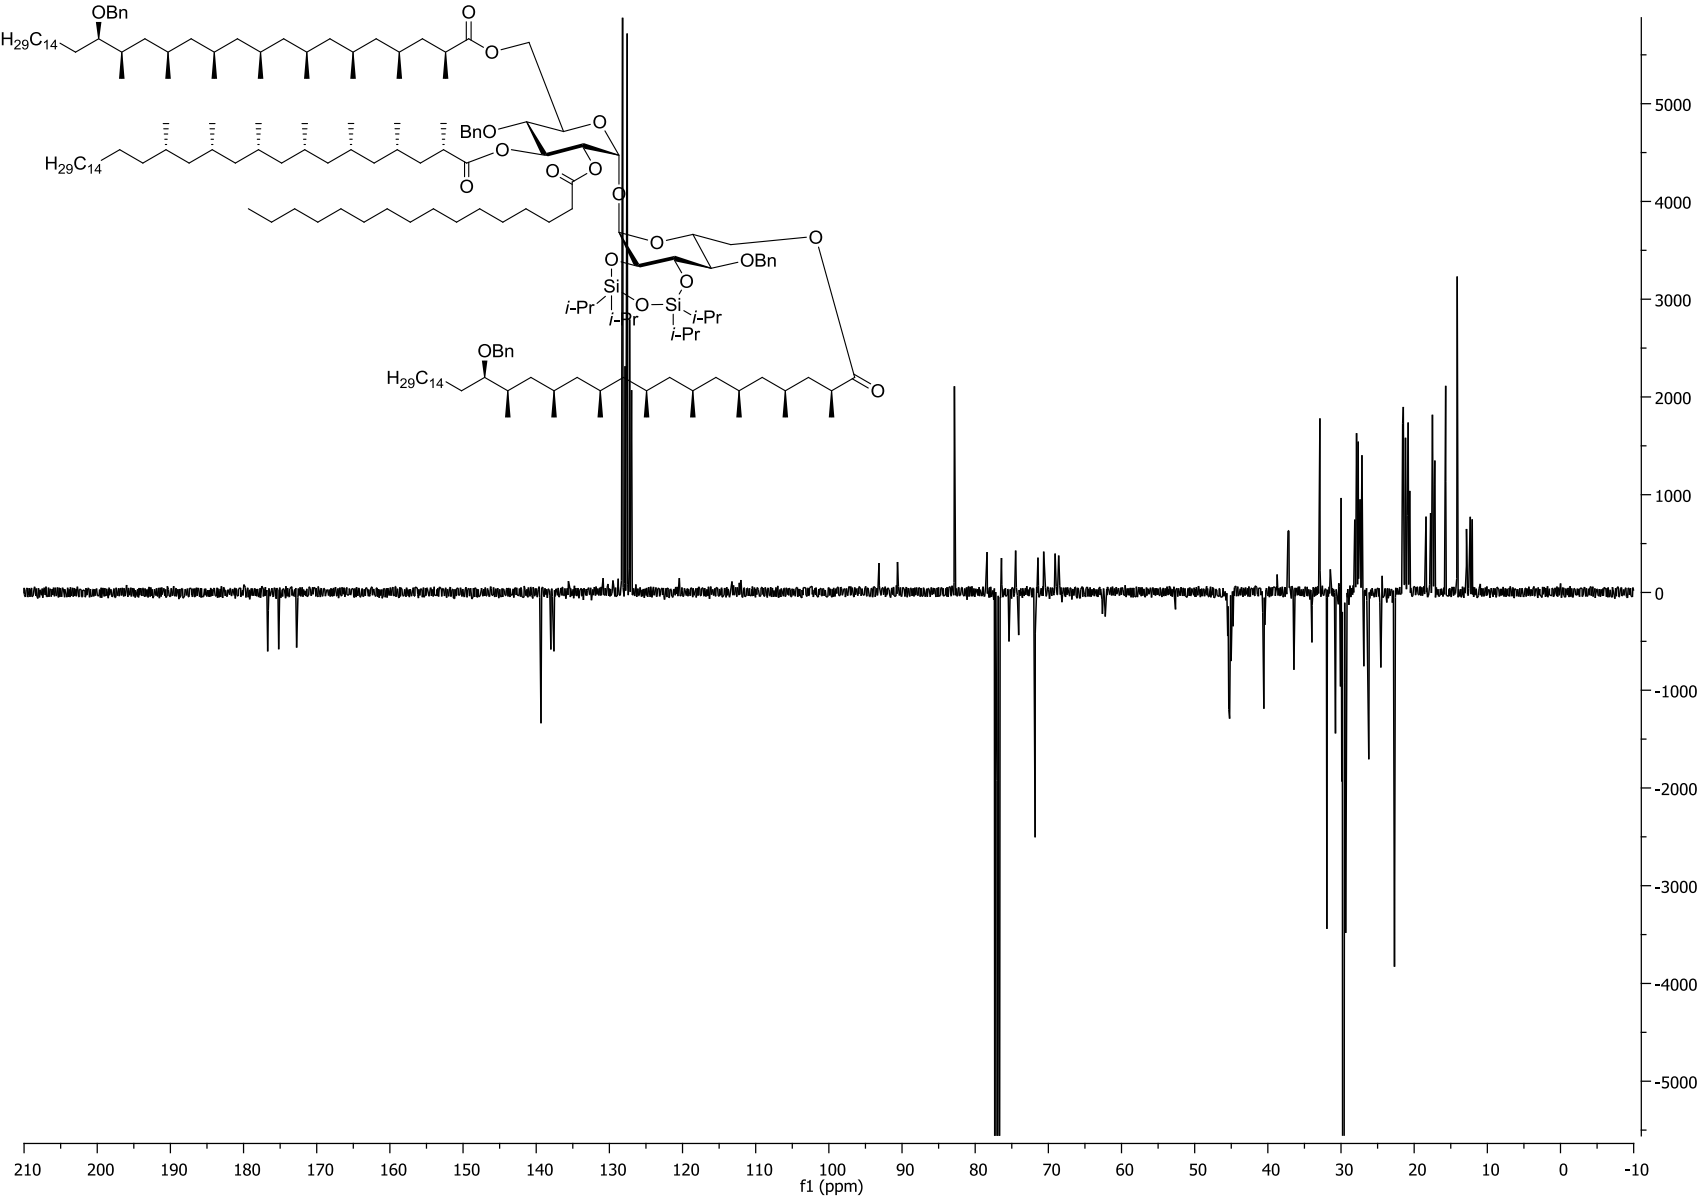

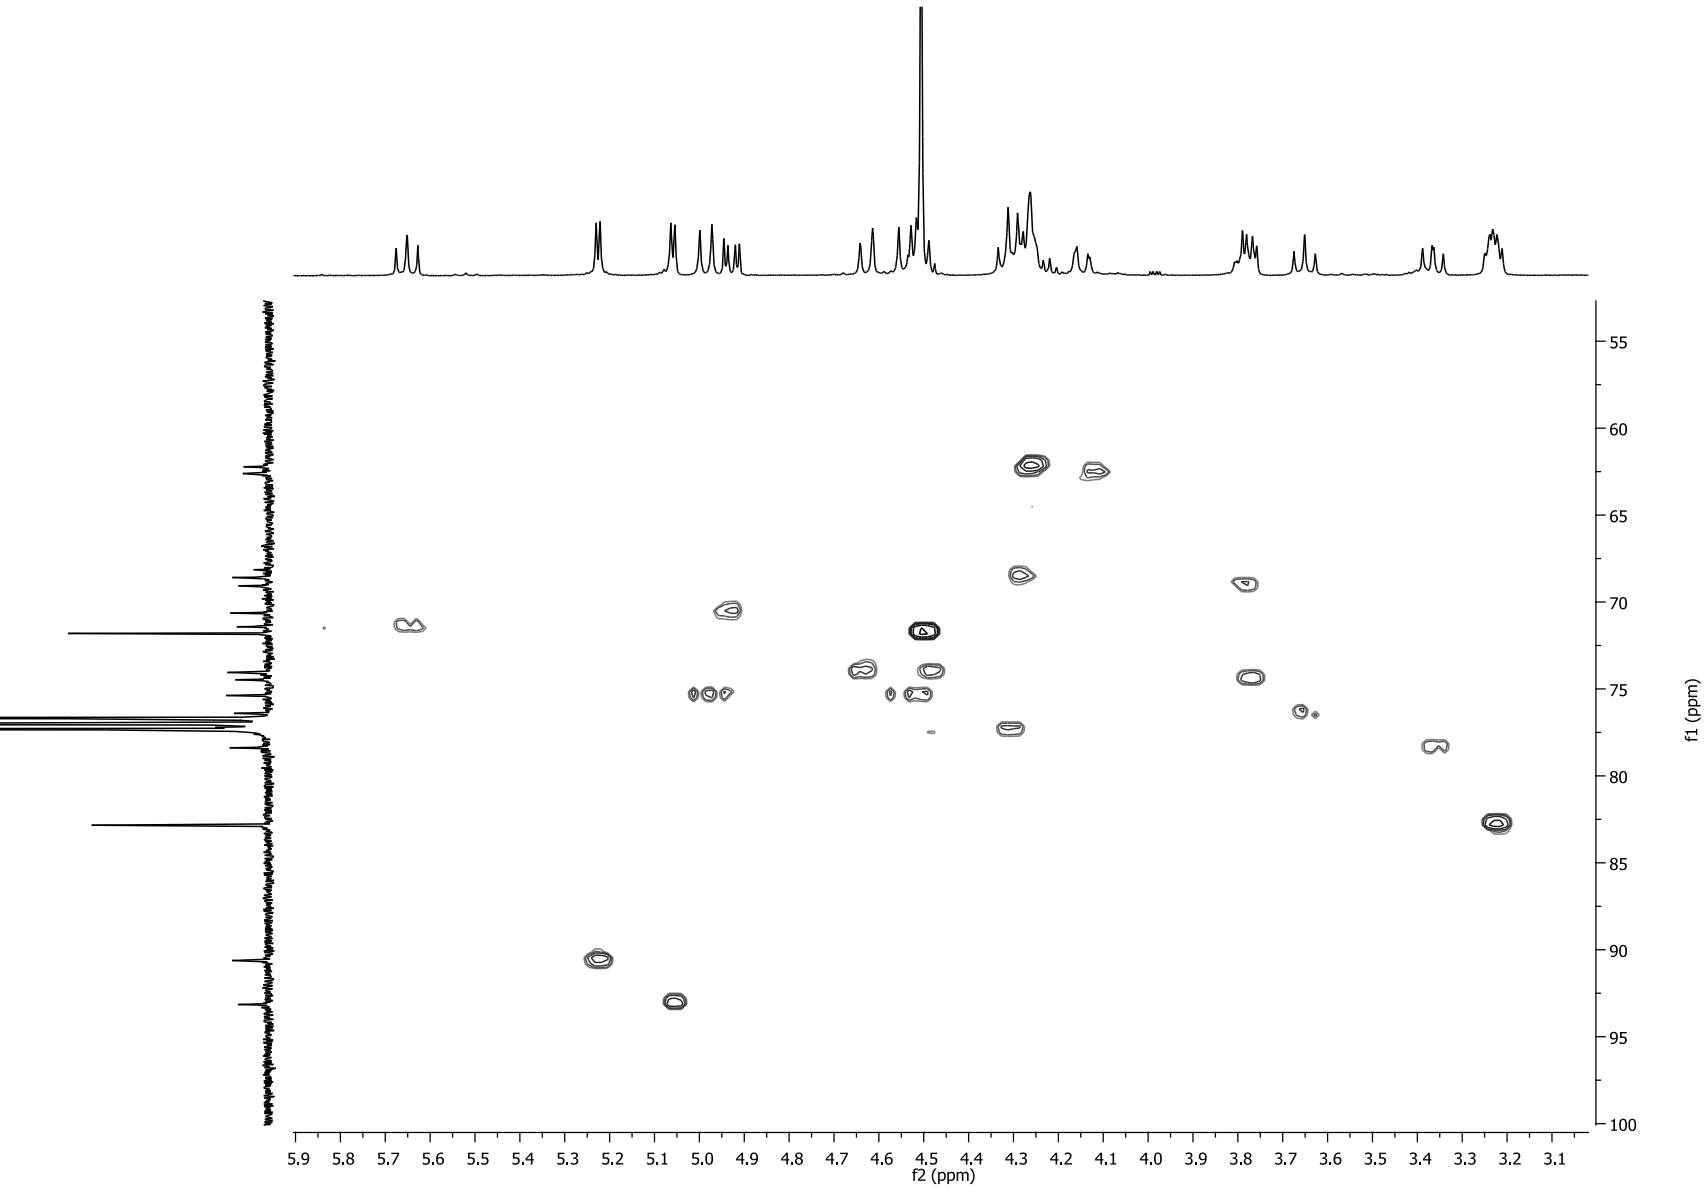

S-24



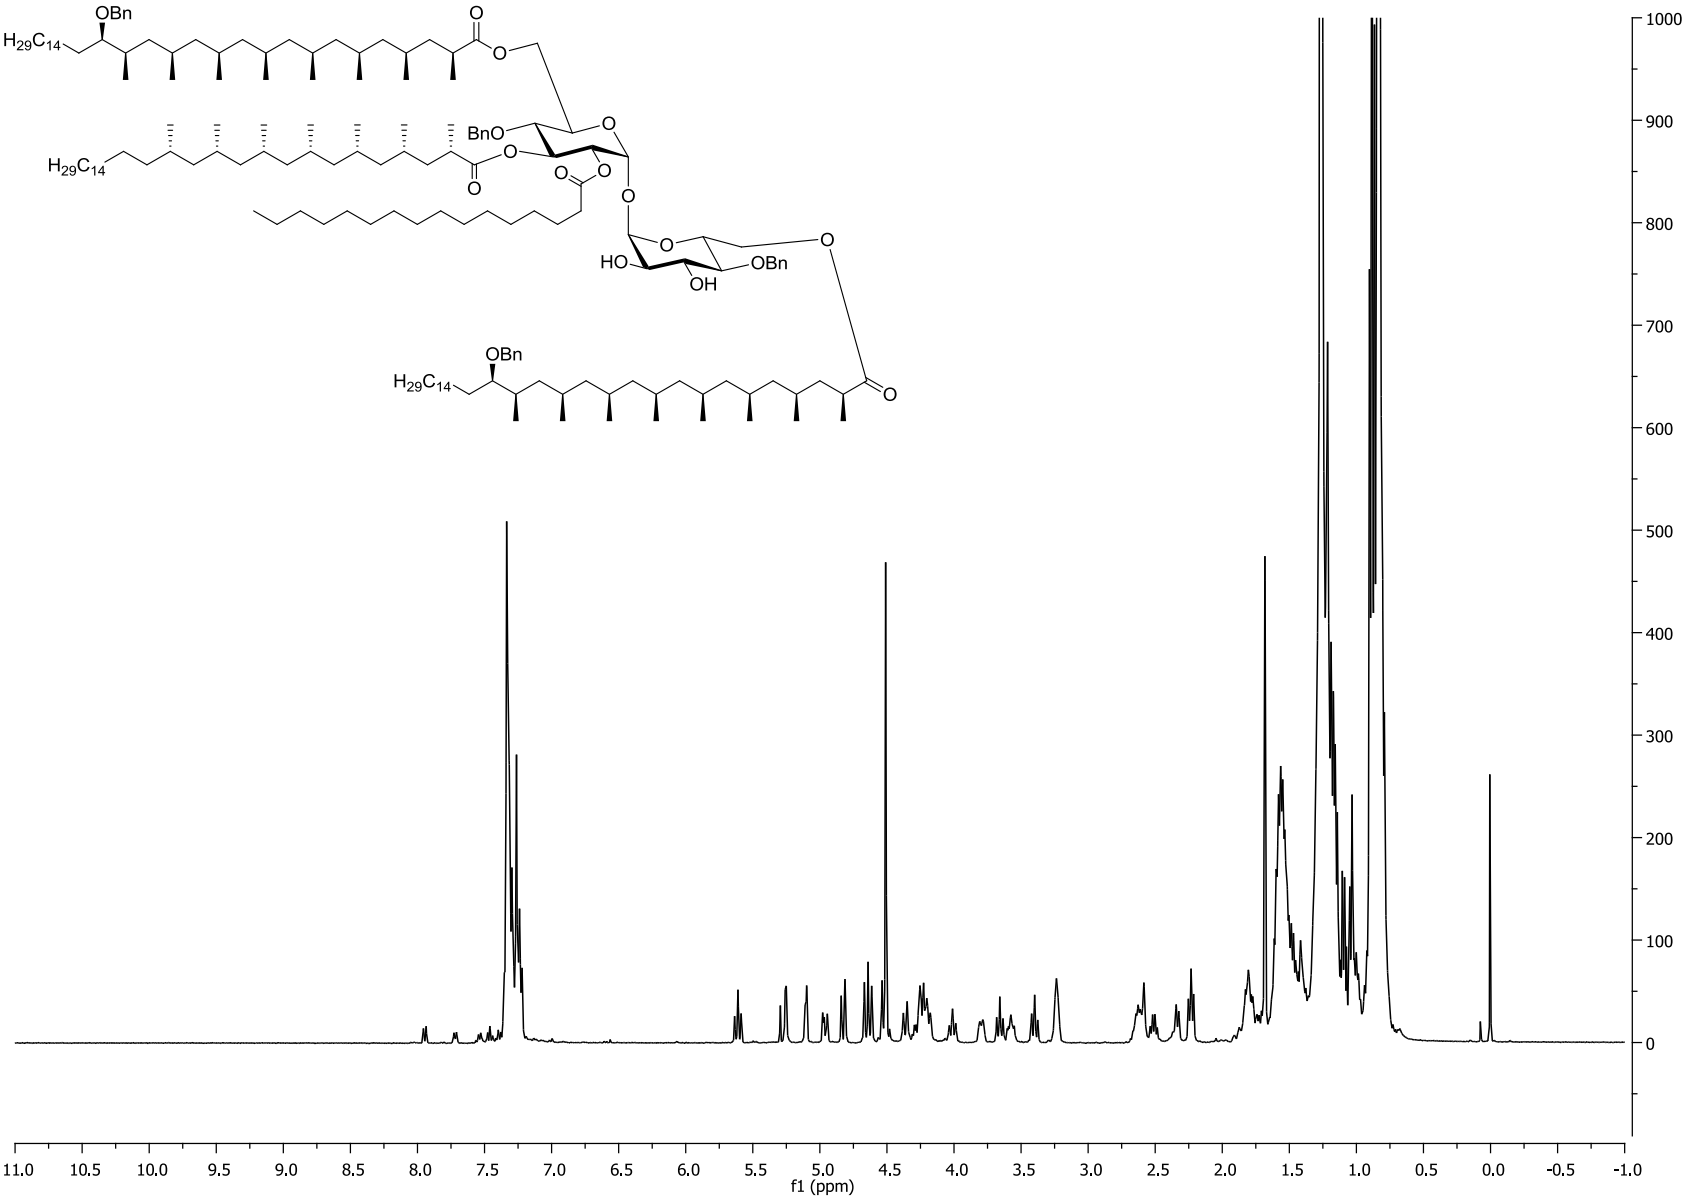

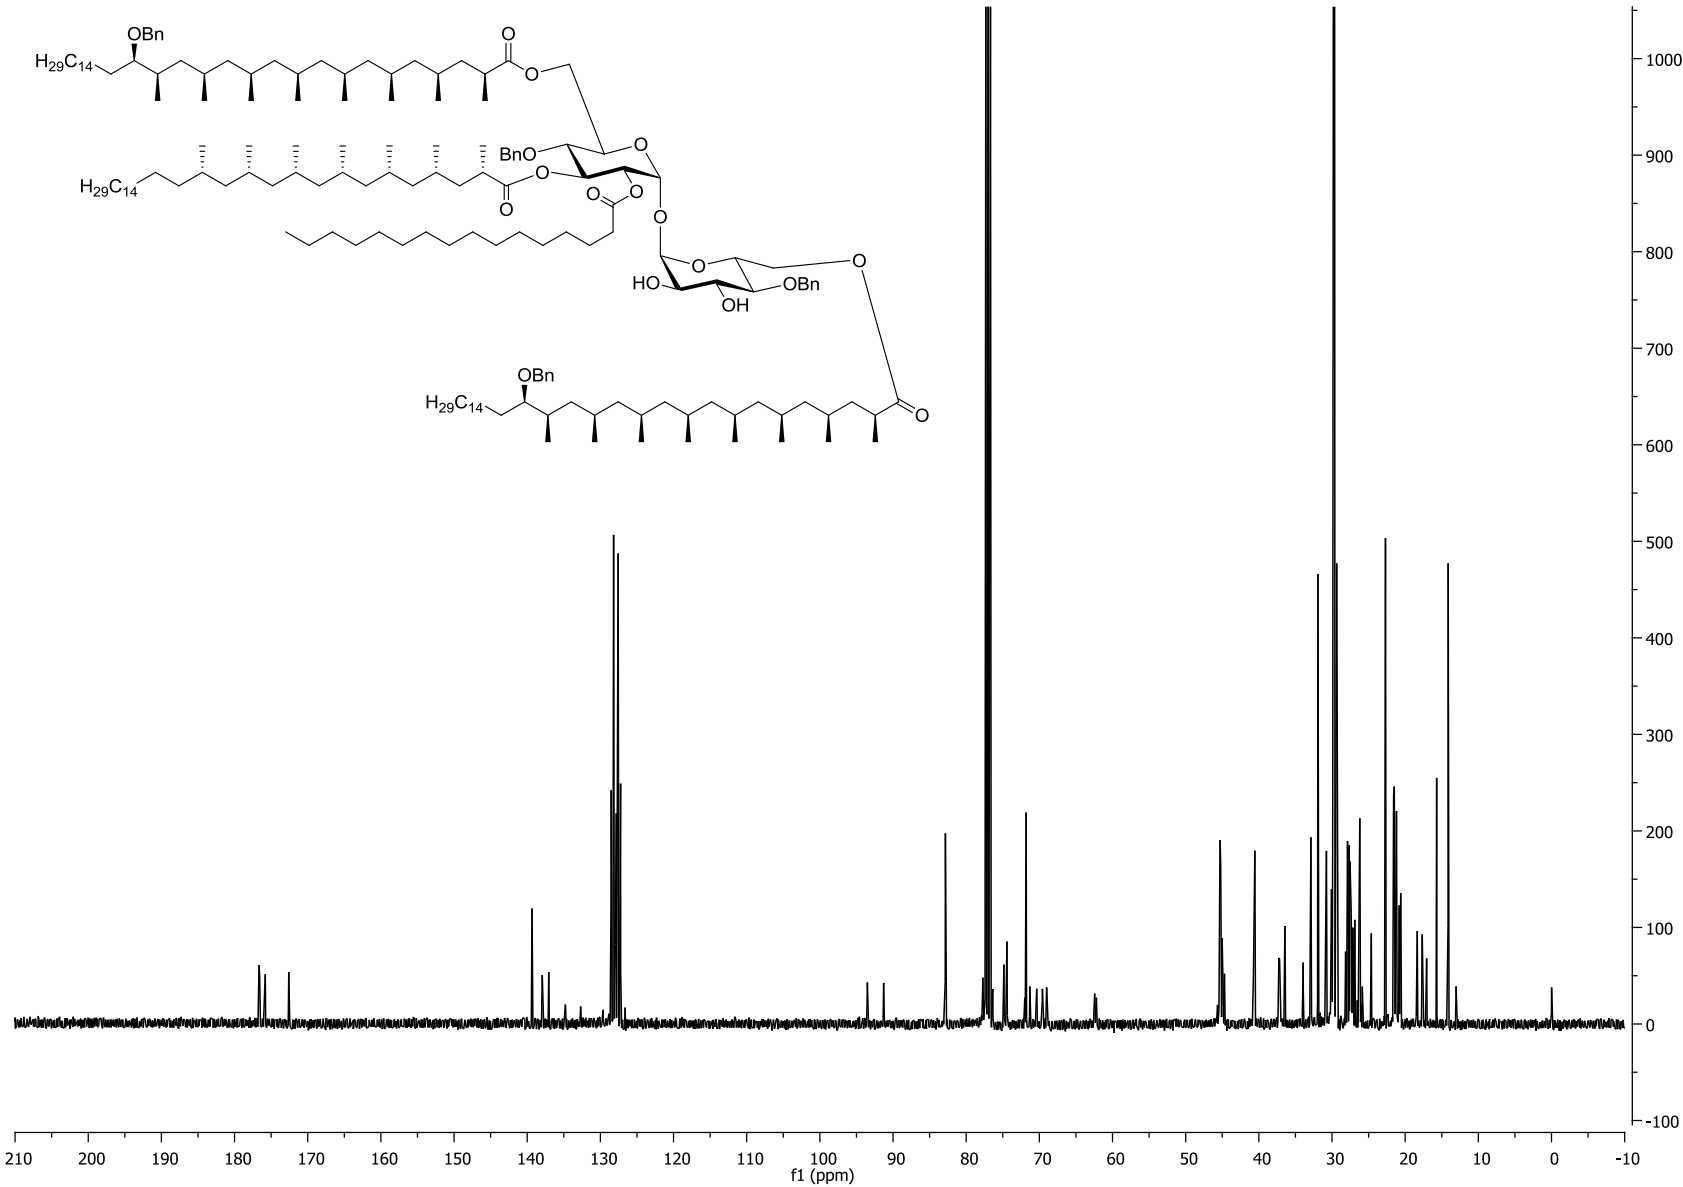

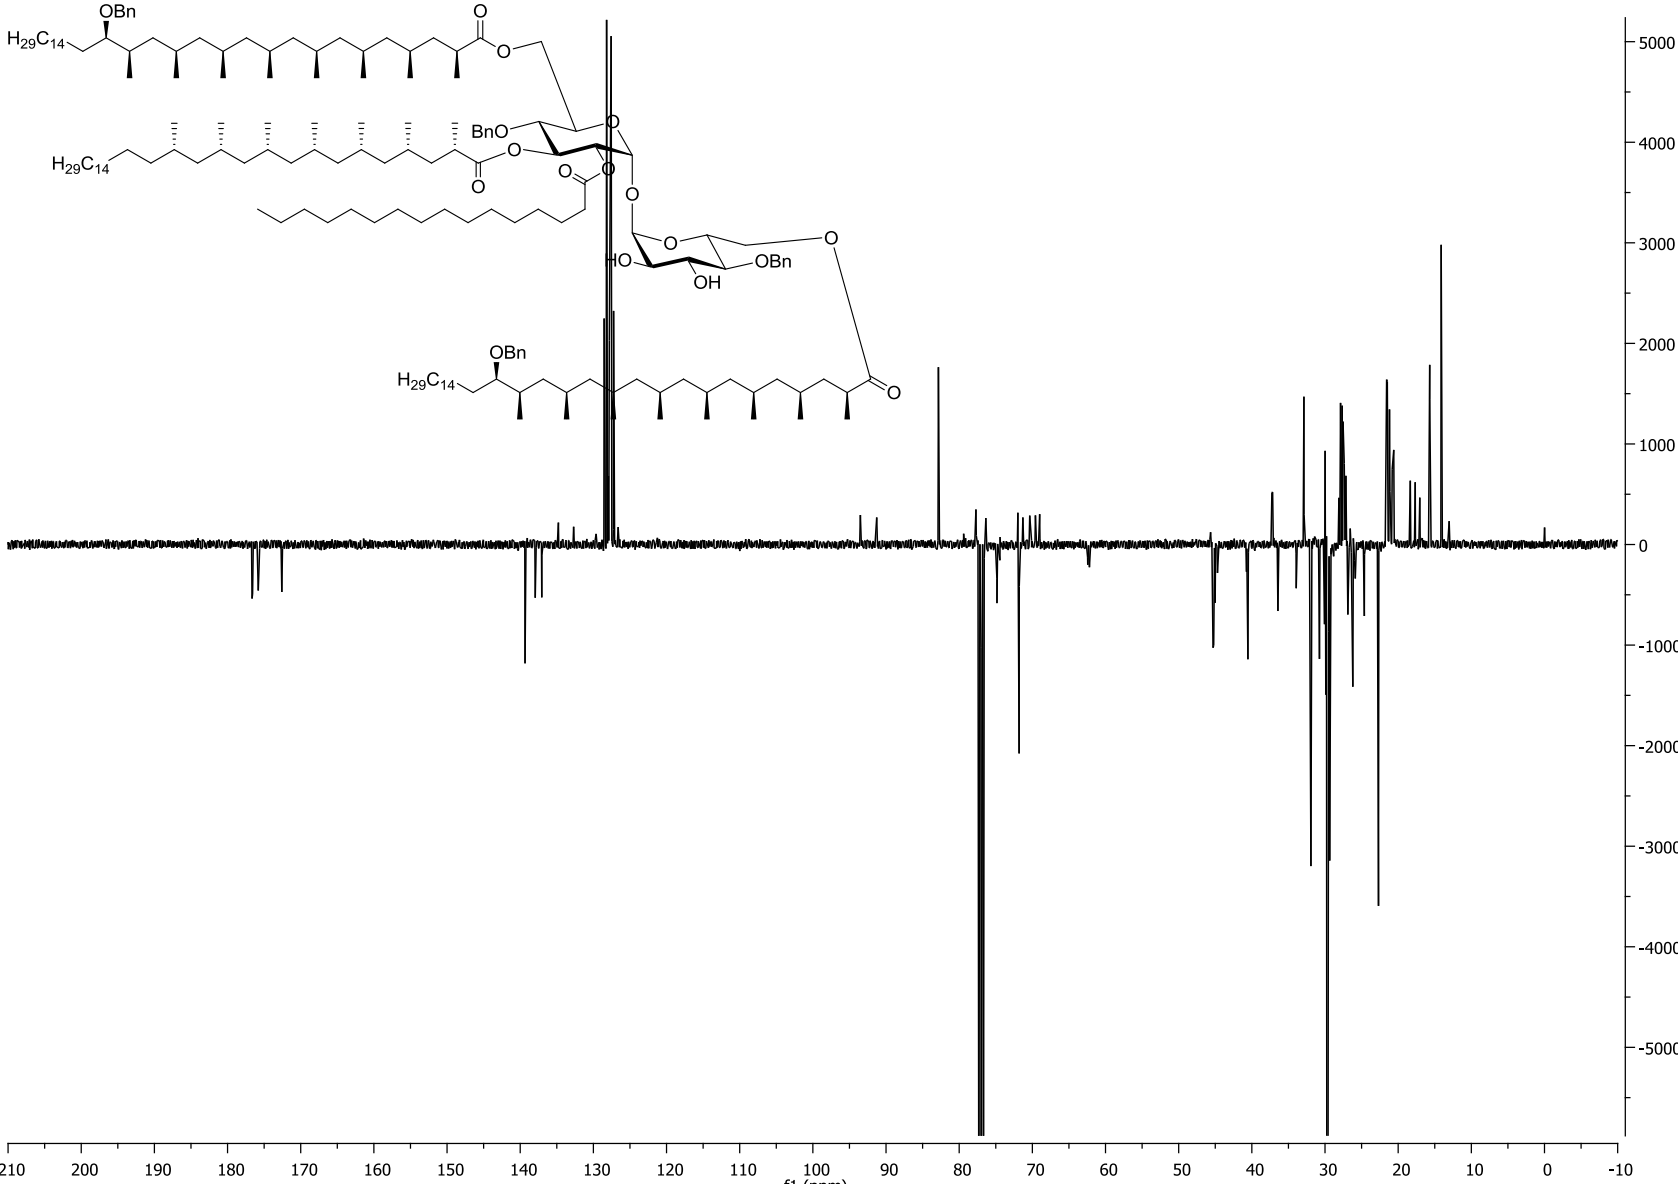

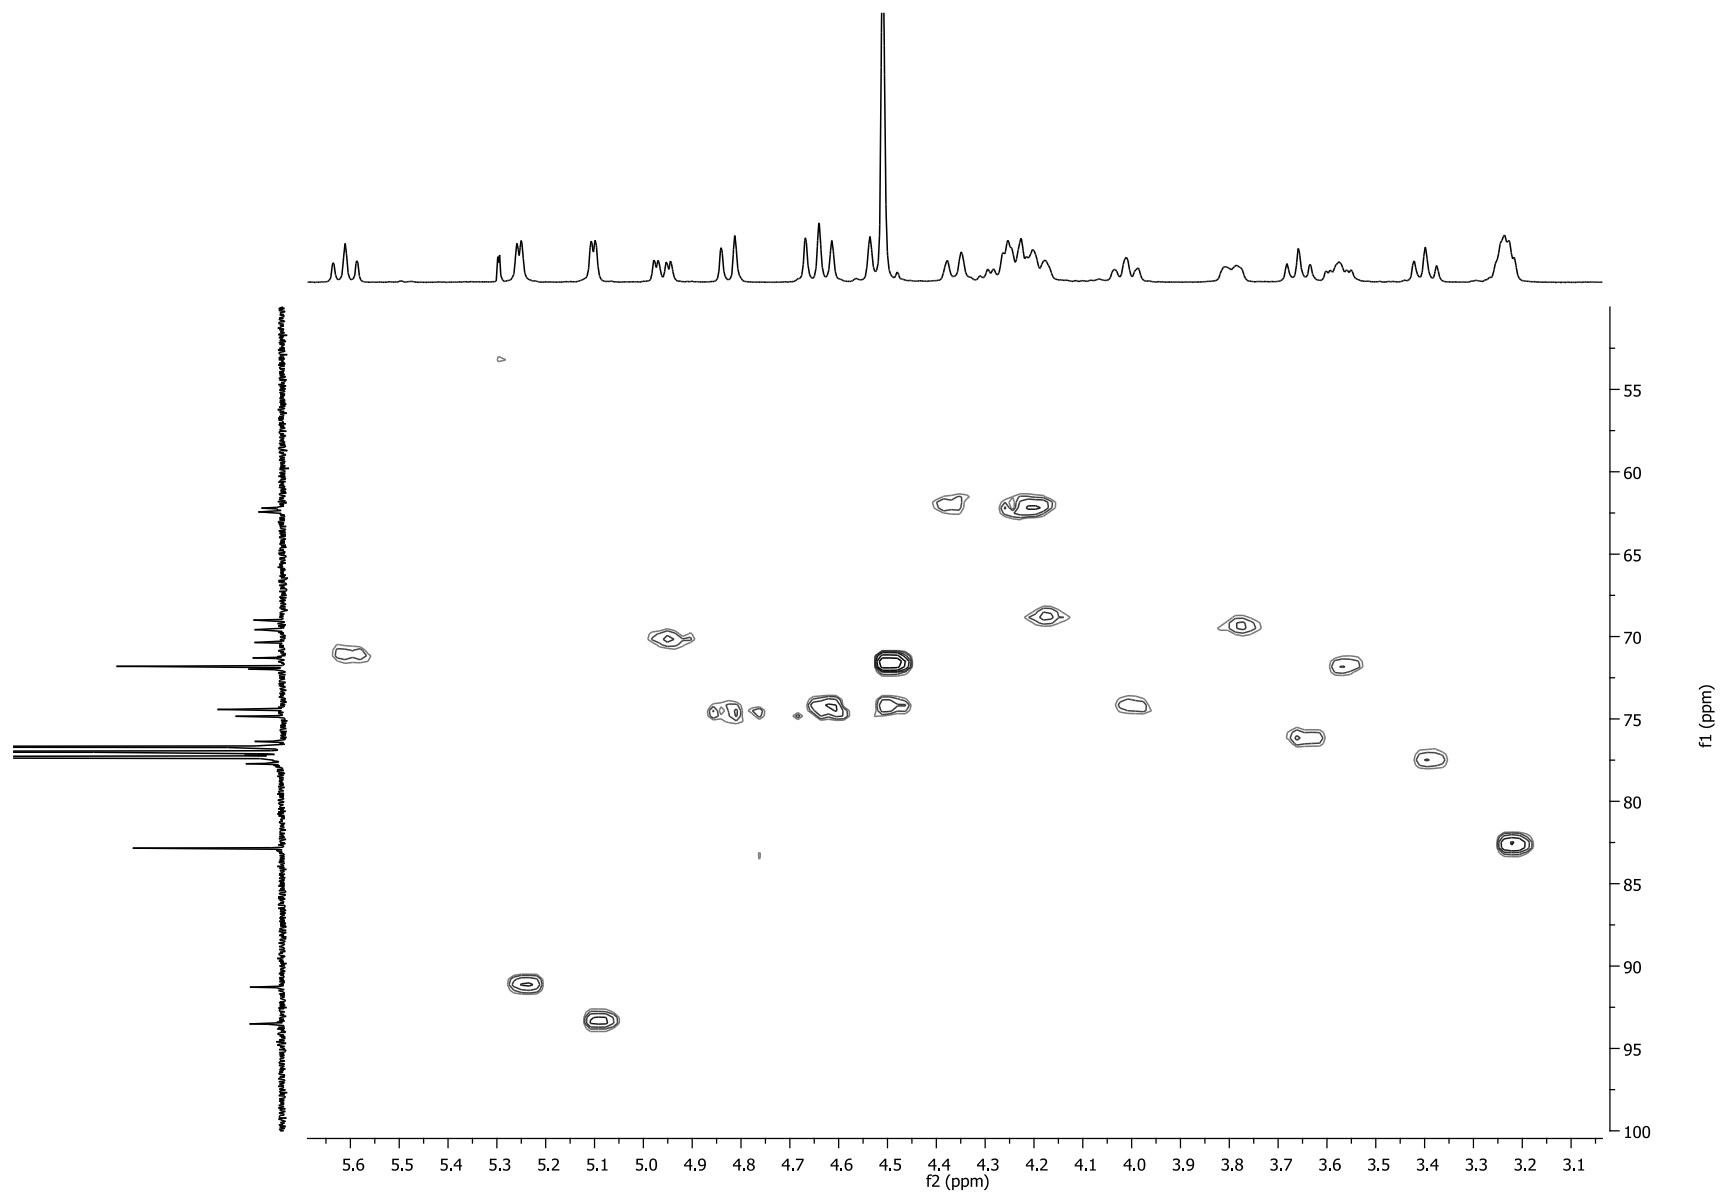

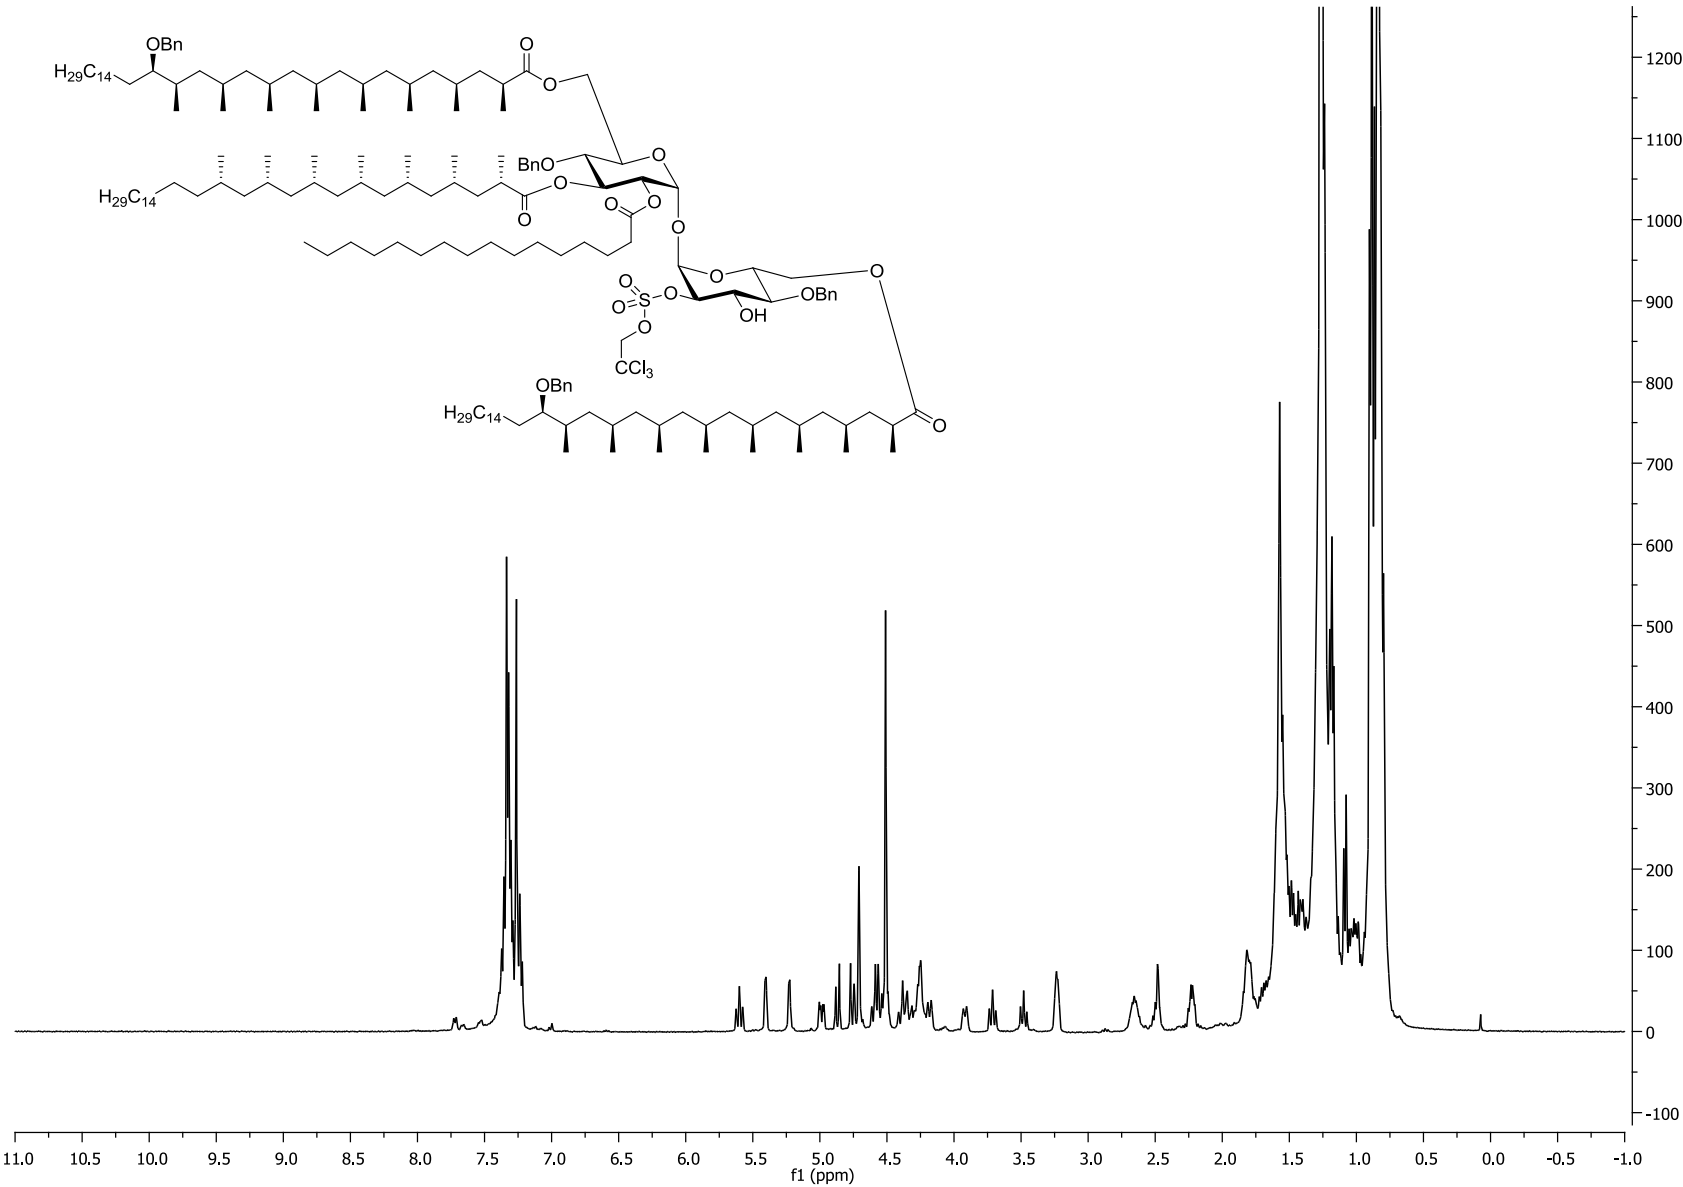

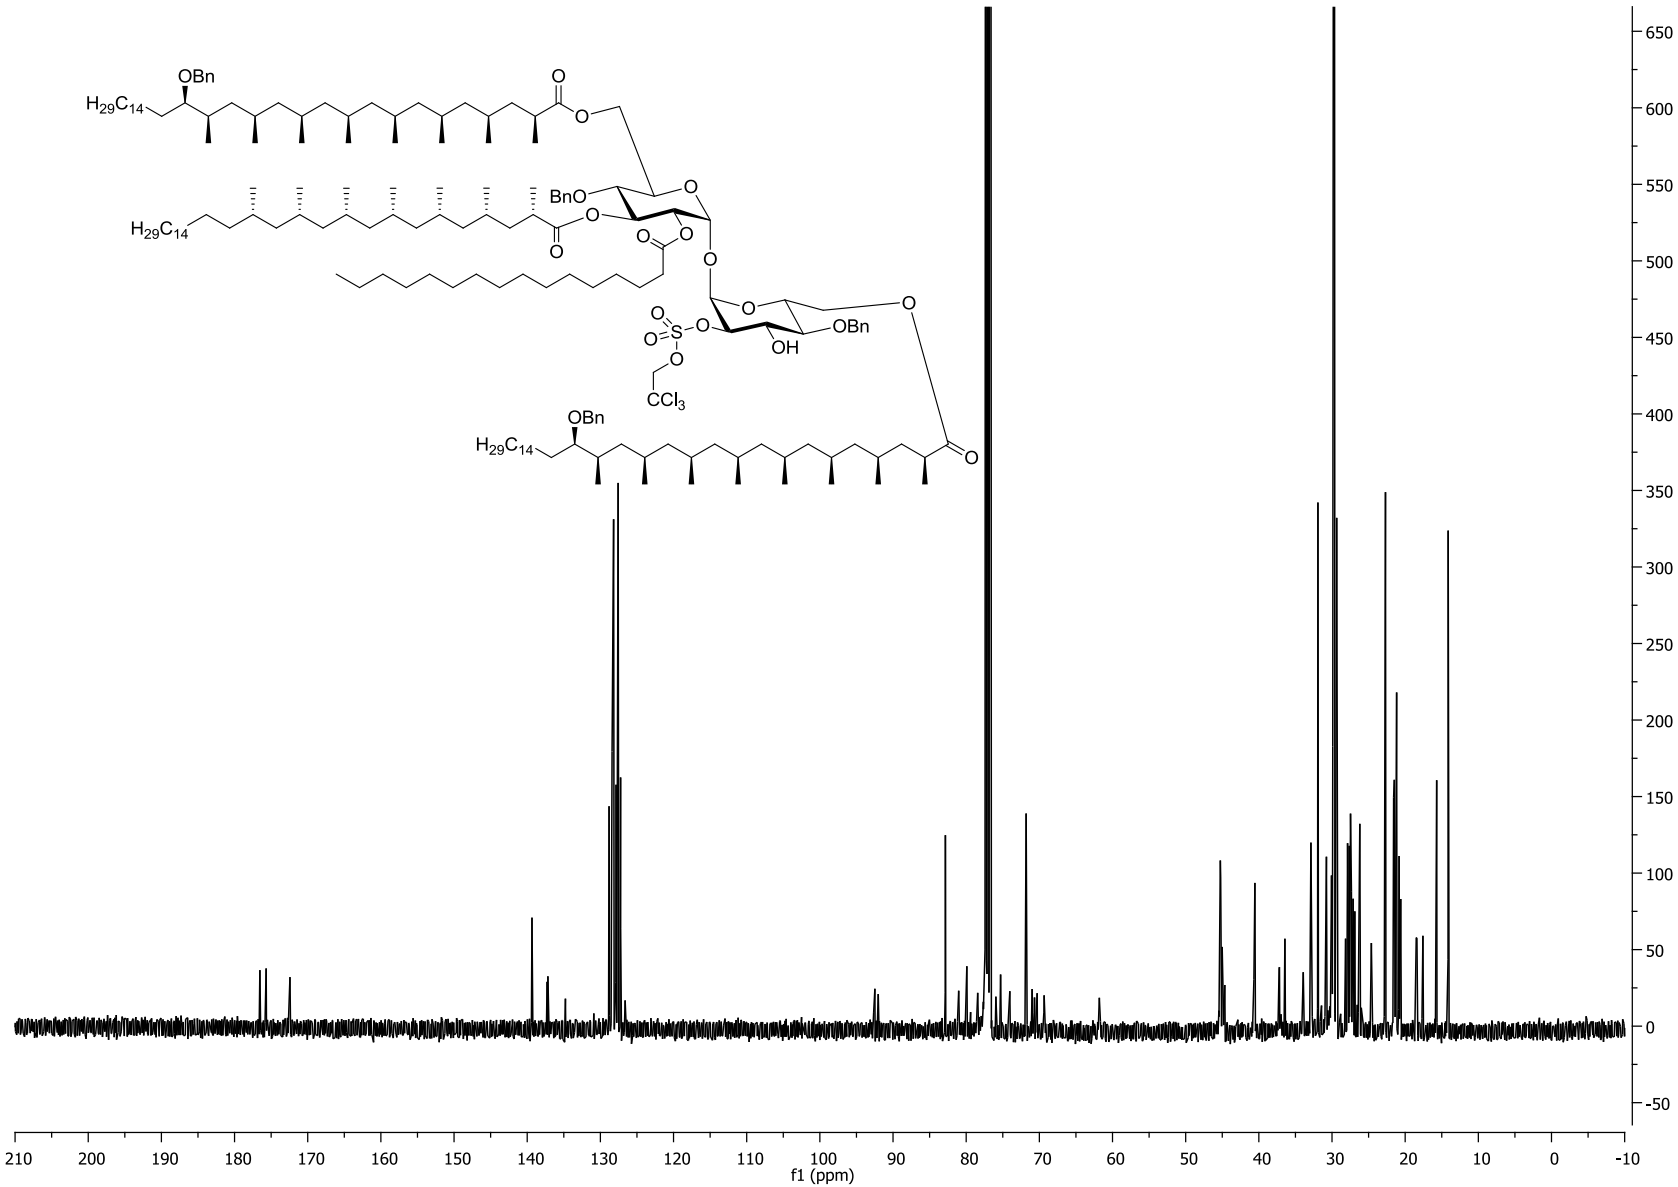

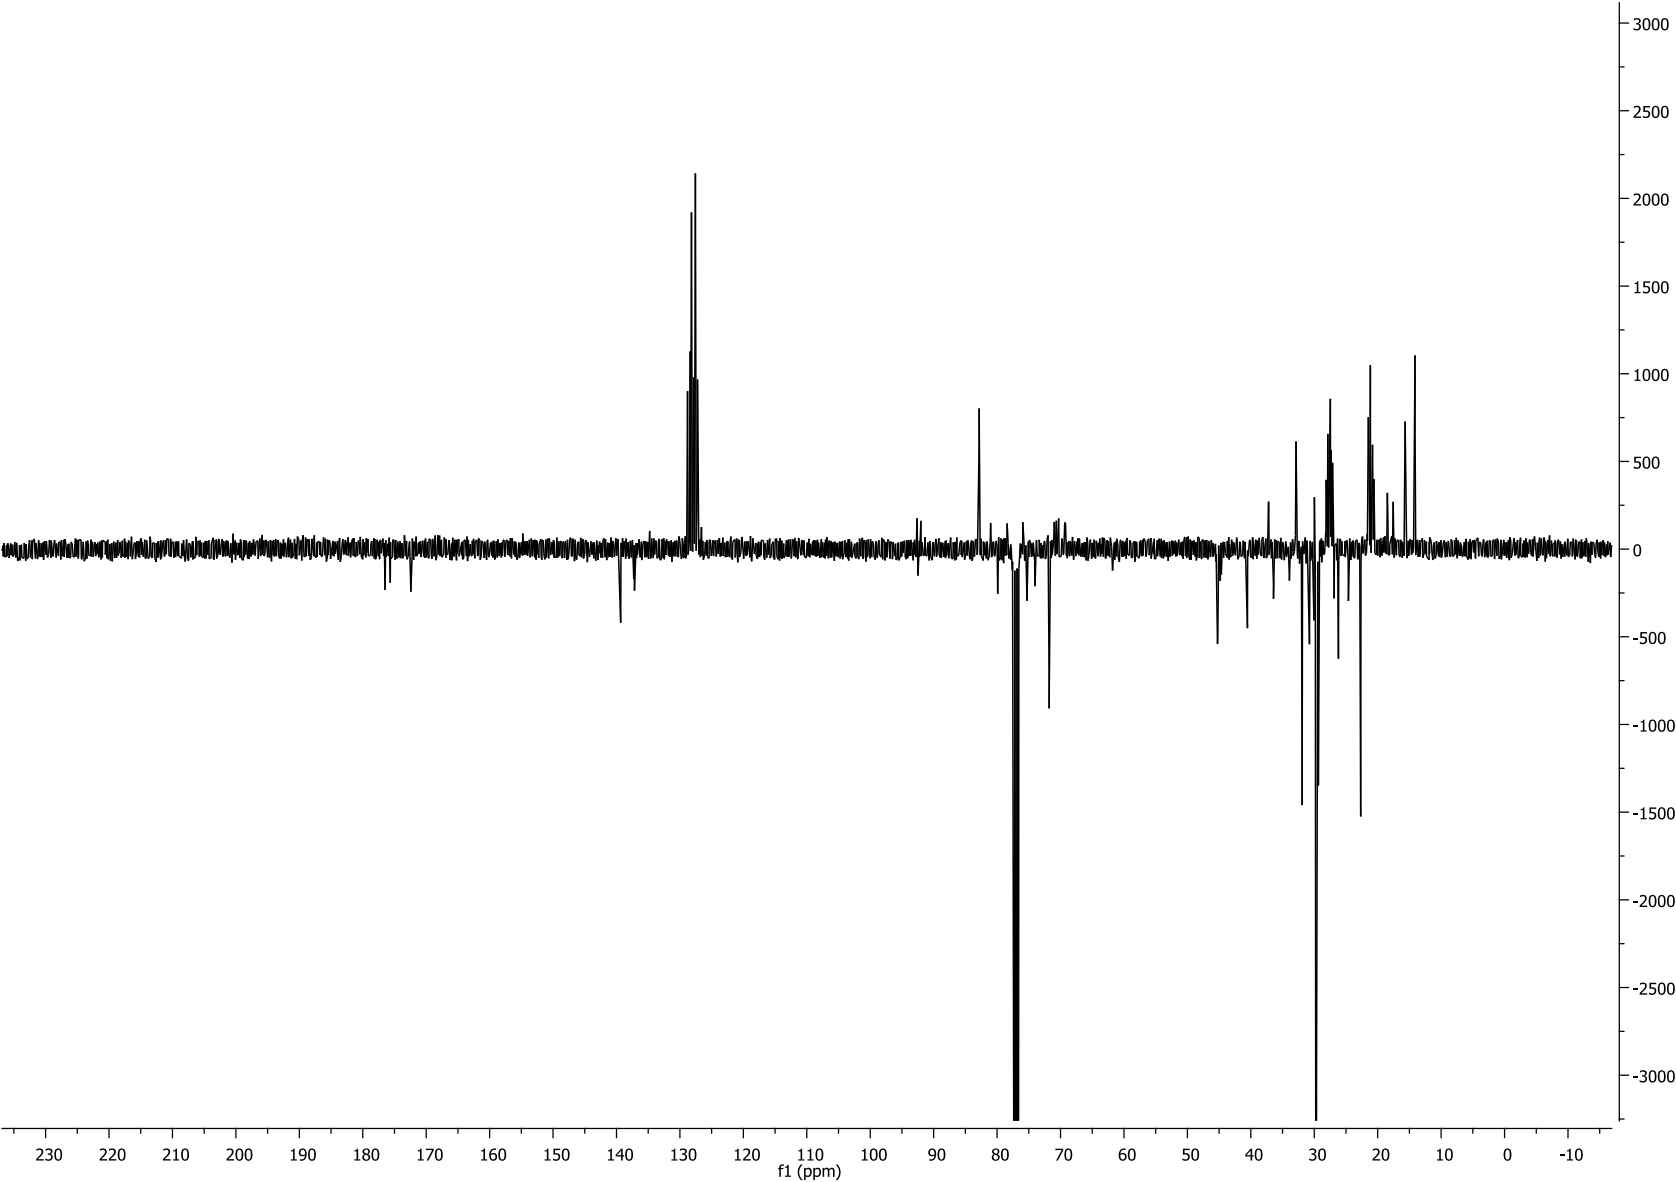

S-31

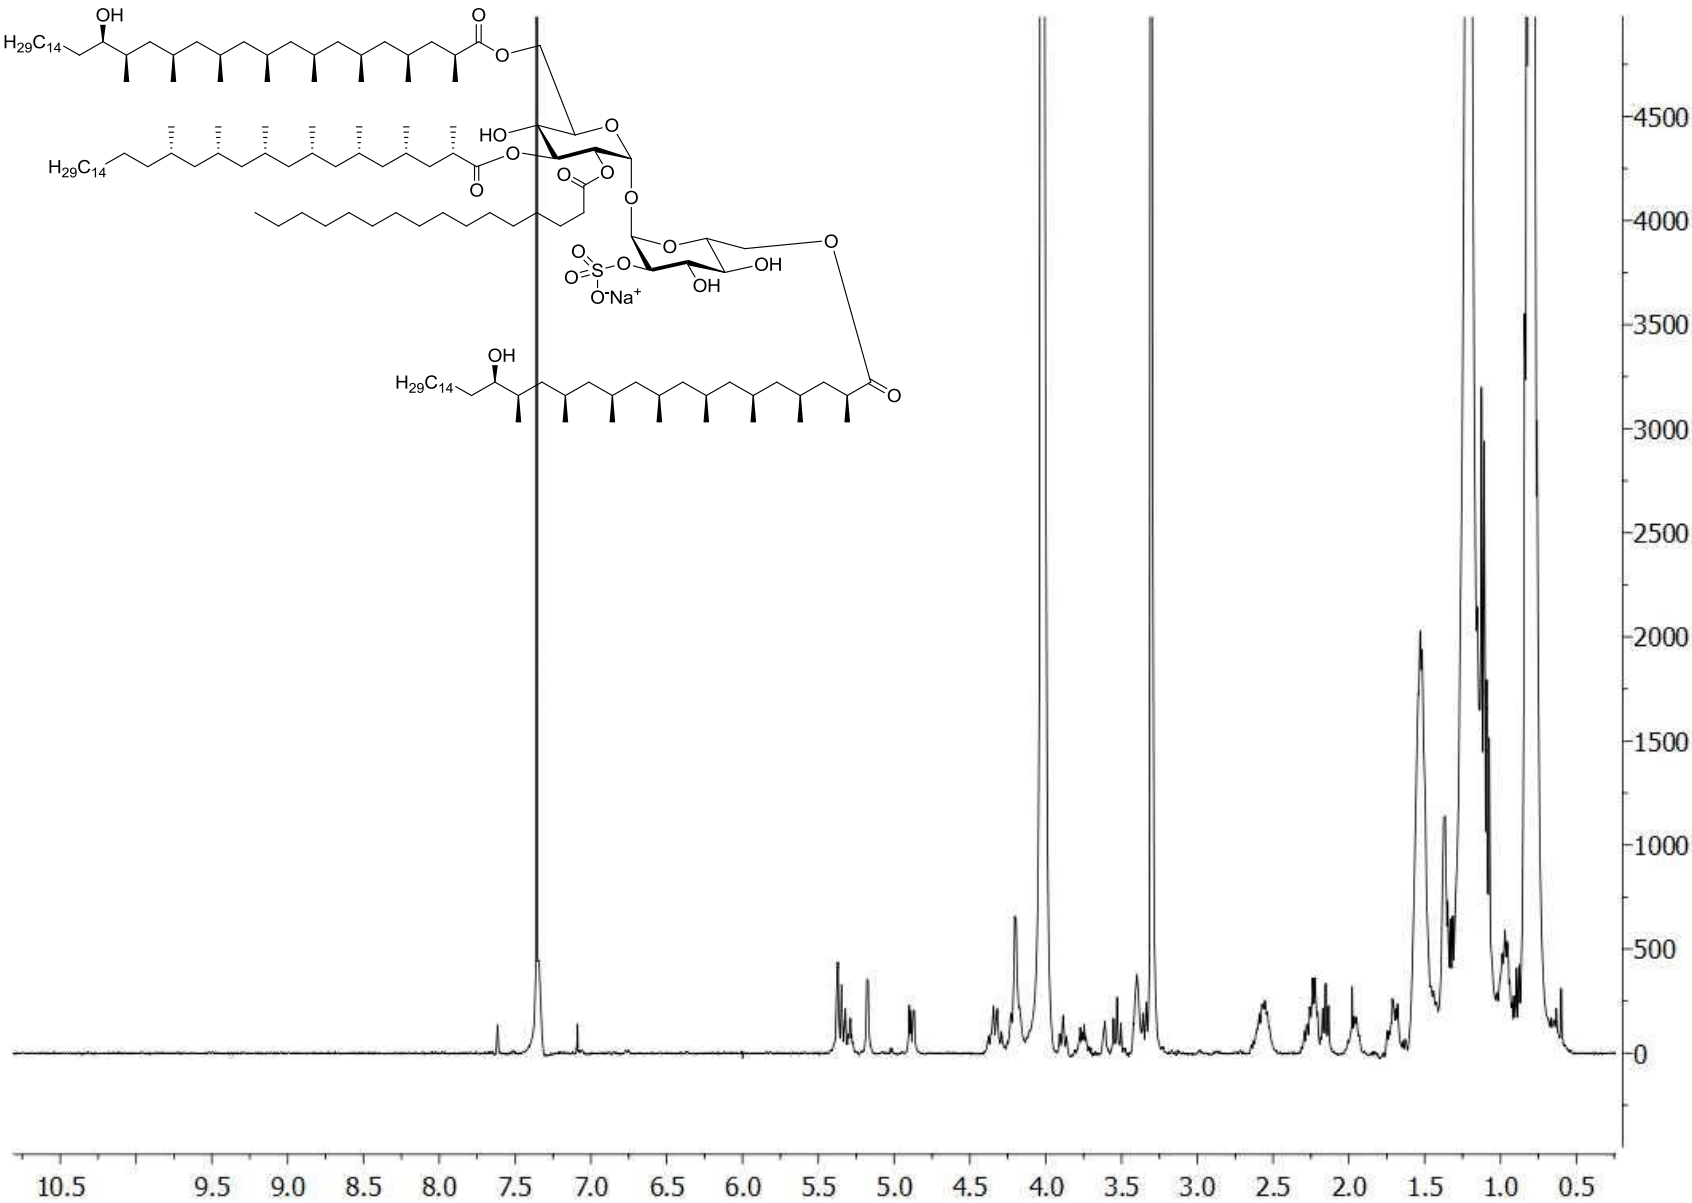

Supplement: c3cc48087a.pdf [file c3cc48087a.pdf]
